# Supplementary material for: DNA barcoding reveals a mysterious high species diversity of conifer-feeding aphids in the mountains of southwest China
Source: PubMed Central journal article supplement (PMC4738281; doi:10.1038/srep20123), 2016-02-03

# **DNA barcoding reveals a mysterious high species diversity of conifer-feeding aphids in the mountains of southwest China**

Rui Chen<sup>1,2</sup>, Li-Yun Jiang<sup>1</sup>, Chen Jing<sup>1</sup>, Ge-Xia Qiao<sup>1\*</sup>

<sup>1</sup> Key Laboratory of Zoological Systematics and Evolution, Institute of Zoology, Chinese Academy of Sciences, No. 1 Beichen West Road, Chaoyang District, Beijing 100101, P.R. China

<sup>2</sup> College of Life Sciences, University of Chinese Academy of Sciences, No. 19, Yuquan Road, Shijingshan District, Beijing 100049, P.R.China

**\*Corresponding author:** *Ge-Xia Qiao*

Address: Key Laboratory of Zoological Systematics and Evolution, Institute of Zoology, Chinese Academy of Sciences, No. 1 Beichen West Road, Chaoyang District, Beijing 100101, P.R. China.

Phone: +86 10 64807133

E-mail: [qiaogx@ioz.ac.cn](mailto:qiaogx@ioz.ac.cn)

**Table S1.** Species list of *Cinara* in the mountains of southwest China. Red font represents the species we did not find in this study

| Species                                              | Host plant family/genera |
|------------------------------------------------------|--------------------------|
| <i>Cinara alba</i> Zhang                             | <i>Picea</i>             |
| <i>Cinara atrotibialis</i> David et Rajasingh        | <i>Pinus</i>             |
| <i>Cinara brevisaeta</i> Zhang, Zhang et Zhong       | <i>Pinus</i>             |
| <i>Cinara confinis</i> (Koch, 1956)                  | <i>Abies</i>             |
| <i>Cinara costata</i> (Zetterstedt)                  | <i>Picea</i>             |
| <i>Cinara formosana</i> (Takahashi)                  | <i>Pinus</i>             |
| <i>Cinara largirostris</i> Zhang, Zhang et Zhong     | <i>Pinus</i>             |
| <i>Cinara laricis</i> (Hartig)                       | <i>Larix</i>             |
| <i>Cinara orientalis</i> (Takahashi)                 | <i>Pinus</i>             |
| <i>Cinara piceae</i> (Panzer)                        | <i>Picea</i>             |
| <i>Cinara pilicornis</i> (Hartig)                    | <i>Picea</i>             |
| <i>Cinara pinea</i> (Mordvilko)                      | <i>Pinus</i>             |
| <i>Cinara pinidensiflorae</i> (Essig et Kuwana)      | <i>Pinus</i>             |
| <i>Cinara pinihabitans</i> (Mordvilko)               | <i>Pinus</i>             |
| <i>Cinara pruiniviridis</i> Zhang, Chen, Zhong et Li | <i>Abies/Picea</i>       |
| <i>Cinara tujafilina</i> (del Guercio)               | Cupressaceae             |
| <i>Cinara subapicula</i> Zhang                       | <i>Pinus</i>             |
| <i>Cinara tibetapini</i> Zhang                       | <i>Pinus</i>             |



**Table S2.** The detailed collection information and GenBank accession numbers of *Cinara* species in the mountains of southwest China

| No.voucher specimens | Host plants                               | Feeding sites | Collection date | Elevation | Species                                            | No. candidate species | GB accession numbers/COI |
|----------------------|-------------------------------------------|---------------|-----------------|-----------|----------------------------------------------------|-----------------------|--------------------------|
| CHR001               | <i>Picea</i> sp.                          | twig          | Jul.1, 2002     | 3450      | <i>Cinara costata</i> (Zetterstedt)                | 1                     | KP339514                 |
| CHR002               | <i>Picea</i> sp.                          | branch        | Jul.1, 2002     | 3020      | <i>Cinara</i> sp.                                  | 2                     | KP339515                 |
| CHR003               | <i>Pinus tabuliformis</i> Carr.           | twig          | Jul.2, 2002     | 3020      | <i>Cinara atrotibialis</i> David et Rajasingh      | 3                     | KP339516                 |
| CHR004               | <i>Larix</i> sp.                          | branch        | Jul.5, 2002     | 3450      | <i>Cinara laricis</i> (Hartig)                     | 4                     | KP339517                 |
| CHR005               | <i>Pinus armandi</i> Franch.              | branch        | Aug.20, 2003    | 2100      | <i>Cinara piniarmandicola</i> Zhang, Zhang & Zhong | 5                     | KP339518                 |
| CHR006               | <i>Pinus yunnanensis</i> Franch.          | twig          | Oct.9, 2003     | 1948      | <i>Cinara pinea</i> (Mordvilko)                    | 6                     | KP339519                 |
| CHR007               | <i>Platycladus orientalis</i> (L.) Franco | twig          | Aug.5, 2003     | 3002      | <i>Cinara</i> sp.                                  | 7                     | KP339520                 |
| CHR008               | <i>Picea</i> sp.                          | twig          | Aug.23, 2003    | 3290      | <i>Cinara</i> sp.                                  | 8                     | KP339521                 |
| CHR009               | <i>Platycladus orientalis</i> (L.) Franco | twig          | Aug.21, 2003    | 3060      | <i>Cinara tujafilina</i> (del Guercio)             | 9                     | KP339522                 |
| CHR010               | <i>Pinus tabuliformis</i> Carr.           | twig          | Aug.21, 2003    | 3060      | <i>Cinara atrotibialis</i> David et Rajasingh      | 3                     | KP339523                 |
| CHR011               | <i>Pinus tabuliformis</i> Carr.           | twig          | Aug.23, 2003    | 3700      | <i>Cinara atrotibialis</i> David et Rajasingh      | 3                     | KP339524                 |
| CHR012               | <i>Pinus tabuliformis</i> Carr.           | twig          | Aug.24, 2003    | 3700      | <i>Cinara atrotibialis</i> David et Rajasingh      | 3                     | KP339525                 |
| CHR013               | <i>Picea</i> sp.                          | twig          | Aug.8, 2004     | 1837      | <i>Cinara pilicornis</i> (Hartig)                  | 10                    | KP339526                 |
| CHR014               | <i>Larix</i> sp.                          | branch        | Aug.9, 2004     | 2053      | <i>Cinara cuneomaculata</i> (del Guercio)          | 11                    | KP339527                 |

|        |                                           |        |              |      |                                                    |    |          |
|--------|-------------------------------------------|--------|--------------|------|----------------------------------------------------|----|----------|
| CHR015 | <i>Tsuga</i> sp.                          | twig   | Jul.27, 2005 | 2230 | <i>Cinara</i> sp.                                  | 12 | KP339528 |
| CHR016 | <i>Pinus yunnanensis</i> Franch.          | twig   | Apr.7, 2005  | 2000 | <i>Cinara</i> sp.                                  | 13 | KP339529 |
| CHR017 | <i>Pinus armandi</i> Franch.              | branch | May.1, 2005  | 1710 | <i>Cinara piniarmandicola</i> Zhang, Zhang & Zhong | 5  | KP339530 |
| CHR018 | <i>Pinus armandi</i> Franch.              | branch | May.5, 2005  | 2300 | <i>Cinara piniarmandicola</i> Zhang, Zhang & Zhong | 5  | KP339531 |
| CHR019 | <i>Pinus yunnanensis</i> Franch.          | twig   | May.5, 2005  | 2300 | <i>Cinara atrotibialis</i> David et Rajasingh      | 3  | KP339532 |
| CHR020 | <i>Platycladus orientalis</i> (L.) Franco | twig   | Apr.20, 2006 | 1900 | <i>Cinara tujafilina</i> (del Guercio)             | 9  | KP339533 |
| CHR021 | <i>Pinus yunnanensis</i> Franch.          | twig   | Apr.20, 2006 | 1900 | <i>Cinara pinea</i> (Mordvilko)                    | 6  | KP339534 |
| CHR022 | <i>Pinus yunnanensis</i> Franch.          | twig   | Apr.21, 2006 | 1900 | <i>Cinara atrotibialis</i> David et Rajasingh      | 3  | KP339535 |
| CHR023 | <i>Pinus armandi</i> Franch.              | branch | Apr.25, 2006 | 2400 | <i>Cinara piniarmandicola</i> Zhang, Zhang & Zhong | 5  | KP339536 |
| CHR024 | <i>Pinus yunnanensis</i> Franch.          | twig   | Apr.26, 2006 | 1920 | <i>Cinara atrotibialis</i> David et Rajasingh      | 3  | KP339537 |
| CHR025 | <i>Pinus yunnanensis</i> Franch.          | twig   | Apr.27, 2006 | 2400 | <i>Cinara formosana</i> (Takahashi)                | 14 | KP339538 |
| CHR026 | <i>Pinus yunnanensis</i> Franch.          | twig   | Apr.27, 2006 | 2400 | <i>Cinara pinea</i> (Mordvilko)                    | 6  | KP339539 |
| CHR027 | <i>Pinus armandi</i> Franch.              | twig   | Apr.27, 2006 | 2400 | <i>Cinara brevisaeta</i> Zhang, Zhang et Zhong     | 15 | KP339540 |
| CHR028 | <i>Pinus armandi</i> Franch.              | branch | Apr.27, 2006 | 2400 | <i>Cinara piniarmandicola</i> Zhang,               | 5  | KP339541 |

|        |                                           |        |              |      | Zhang & Zhong                                       |    |          |
|--------|-------------------------------------------|--------|--------------|------|-----------------------------------------------------|----|----------|
| CHR029 | <i>Pinus armandi</i> Franch.              | branch | Apr.28, 2006 | 2930 | <i>Cinara piniarmandicola</i> Zhang, Zhang & Zhong  | 5  | KP339542 |
| CHR030 | <i>Picea likiangensis</i> (Franch) Pritz  | twig   | Apr.28, 2006 | 3220 | <i>Cinara alba</i> Zhang                            | 16 | KP339543 |
| CHR031 | <i>Pinus yunnanensis</i> Franch.          | twig   | Apr.28, 2006 | 2740 | <i>Cinara atrotibialis</i> David et Rajasingh       | 3  | KP339544 |
| CHR032 | <i>Picea</i> sp.                          | twig   | Apr.29, 2006 | 3130 | <i>Cinara costata</i> (Zetterstedt)                 | 1  | KP339545 |
| CHR033 | <i>Abies</i> sp.                          | twig   | Apr.29, 2006 | 3150 | <i>Cinara pruinviridis</i> Zhang, Chen, Zhong et Li | 17 | KP339546 |
| CHR034 | <i>Pinus armandi</i> Franch.              | branch | Apr.29, 2006 | 3150 | <i>Cinara piniarmandicola</i> Zhang, Zhang & Zhong  | 5  | KP339547 |
| CHR035 | <i>Picea</i> sp.                          | twig   | Apr.30, 2006 | 2730 | <i>Cinara</i> sp.                                   | 2  | KP339548 |
| CHR036 | Pinaceae                                  | twig   | Aug.16, 2005 | 3650 | <i>Cinara atrotibialis</i> David et Rajasingh       | 3  | KP339549 |
| CHR037 | Pinaceae                                  | twig   | Sept.6, 2005 | 3173 | <i>Cinara atrotibialis</i> David et Rajasingh       | 3  | KP339550 |
| CHR038 | Cupressaceae                              | twig   | Apr.30, 2006 | 2710 | <i>Cinara</i> sp.                                   | 18 | KP339551 |
| CHR039 | <i>Picea</i> sp.                          | branch | May.2, 2006  | 3570 | <i>Cinara costata</i> (Zetterstedt)                 | 1  | KP339552 |
| CHR040 | <i>Picea</i> sp.                          | twig   | May.3, 2006  | 3320 | <i>Cinara</i> sp.                                   | 19 | KP339553 |
| CHR041 | <i>Pinus yunnanensis</i> Franch.          | twig   | May.4, 2006  | 3460 | <i>Cinara</i> sp.                                   | 20 | KP339554 |
| CHR042 | <i>Platycladus orientalis</i> (L.) Franco | twig   | May.8, 2006  | 2200 | <i>Cinara</i> sp.                                   | 21 | KP339555 |
| CHR043 | <i>Pinus armandi</i> Franch.              | branch | May.9, 2006  | 2260 | <i>Cinara piniarmandicola</i> Zhang, Zhang & Zhong  | 5  | KP339556 |

|        |                                              |        |              |      |                                                       |    |          |
|--------|----------------------------------------------|--------|--------------|------|-------------------------------------------------------|----|----------|
| CHR044 | <i>Pinus yunnanensis</i><br>Franch.          | twig   | May.9, 2006  | 2350 | <i>Cinara formosana</i> (Takahashi)                   | 14 | KP339557 |
| CHR045 | <i>Platyclusus orientalis</i><br>(L.) Franco | twig   | May.12, 2006 | 2150 | <i>Cinara</i> sp.                                     | 21 | KP339558 |
| CHR046 | <i>Pinus armandi</i> Franch.                 | branch | May.16, 2006 | 2150 | <i>Cinara piniarmandicola</i> Zhang,<br>Zhang & Zhong | 5  | KP339559 |
| CHR047 | <i>Pinus armandi</i> Franch.                 | branch | May.16, 2006 | 2060 | <i>Cinara piniarmandicola</i> Zhang,<br>Zhang & Zhong | 5  | KP339560 |
| CHR048 | <i>Juniperus formosana</i><br>Hayata.        | twig   | Jul.8, 2009  | 2705 | <i>Cinara</i> sp.                                     | 7  | KP339561 |
| CHR049 | <i>Pinus tabuliformis</i> Carr.              | twig   | Jul.9, 2009  | 2537 | <i>Cinara</i> sp.                                     | 22 | KP339562 |
| CHR050 | <i>Picea</i> sp.                             | twig   | May.22, 2009 | 2703 | <i>Cinara pilicornis</i> (Hartig)                     | 10 | KP339563 |
| CHR051 | <i>Picea</i> sp.                             | twig   | Jun.4, 2009  | 3871 | <i>Cinara pilicornis</i> (Hartig)                     | 10 | KP339564 |
| CHR052 | Cupressaceae                                 | twig   | May.24, 2009 | 2089 | <i>Cinara</i> sp.                                     | 7  | KP339565 |
| CHR053 | <i>Picea wilsonii</i> Mast                   | twig   | May.26, 2009 | 2361 | <i>Cinara</i> sp.                                     | 23 | KP339566 |
| CHR054 | <i>Platyclusus orientalis</i><br>(L.) Franco | branch | May.28, 2009 | 2296 | <i>Cinara tujafilina</i> (del Guercio)                | 9  | KP339567 |
| CHR055 | <i>Pinus armandi</i> Franch.                 | branch | Jun.2, 2009  | 1603 | <i>Cinara piniarmandicola</i> Zhang,<br>Zhang & Zhong | 5  | KP339568 |
| CHR056 | <i>Pinus armandi</i> Franch.                 | branch | Jun.3, 2009  | 1521 | <i>Cinara piniarmandicola</i> Zhang,<br>Zhang & Zhong | 5  | KP339569 |
| CHR057 | <i>Picea</i> sp.                             | branch | Nov.8, 2009  | 1714 | <i>Cinara</i> sp.                                     | 24 | KP339570 |
| CHR058 | Cupressaceae                                 | twig   | Nov.9, 2009  | 1811 | <i>Cinara</i> sp.                                     | 25 | KP339571 |
| CHR059 | <i>Picea</i> sp.                             | branch | Oct.24, 2010 | 1900 | <i>Cinara</i> sp.                                     | 24 | KP339572 |
| CHR060 | Pinaceae                                     | branch | Aug.16, 2010 | 3668 | <i>Cinara piniarmandicola</i> Zhang,<br>Zhang & Zhong | 5  | KP339573 |

|        |                                  |        |              |      |                                                    |    |          |
|--------|----------------------------------|--------|--------------|------|----------------------------------------------------|----|----------|
| CHR061 | Cupressaceae                     | twig   | Aug.12, 2010 | 4782 | <i>Cinara</i> sp.                                  | 7  | KP339574 |
| CHR062 | <i>Pinus armandi</i> Franch.     | twig   | May.21, 2012 | 2025 | <i>Cinara brevisaeta</i> Zhang, Zhang et Zhong     | 15 | KP339575 |
| CHR063 | <i>Pinus armandi</i> Franch.     | twig   | May.21, 2012 | 2065 | <i>Cinara brevisaeta</i> Zhang, Zhang et Zhong     | 15 | KP339576 |
| CHR064 | <i>Pinus armandi</i> Franch.     | twig   | May.21, 2012 | 2280 | <i>Cinara brevisaeta</i> Zhang, Zhang et Zhong     | 15 | KP339577 |
| CHR065 | <i>Pinus armandi</i> Franch.     | branch | May.21, 2012 | 2280 | <i>Cinara piniarmandicola</i> Zhang, Zhang & Zhong | 5  | KP339578 |
| CHR066 | <i>Pinus armandi</i> Franch.     | trunk  | May.21, 2012 | 2280 | <i>Cinara piniarmandicola</i> Zhang, Zhang & Zhong | 5  | KP339579 |
| CHR067 | <i>Pinus armandi</i> Franch.     | branch | May.21, 2012 | 2280 | <i>Cinara piniarmandicola</i> Zhang, Zhang & Zhong | 5  | KP339580 |
| CHR068 | <i>Pinus yunnanensis</i> Franch. | twig   | May.22, 2012 | 1953 | <i>Cinara pinea</i> (Mordvilko)                    | 6  | KP339581 |
| CHR069 | <i>Pinus armandi</i> Franch.     | twig   | May.22, 2012 | 2442 | <i>Cinara brevisaeta</i> Zhang, Zhang et Zhong     | 15 | KP339582 |
| CHR070 | <i>Pinus armandi</i> Franch.     | trunk  | May.22, 2012 | 2468 | <i>Cinara piniarmandicola</i> Zhang, Zhang & Zhong | 5  | KP339583 |
| CHR071 | <i>Pinus armandi</i> Franch.     | twig   | May.22, 2012 | 2468 | <i>Cinara brevisaeta</i> Zhang, Zhang et Zhong     | 15 | KP339584 |
| CHR072 | <i>Pinus yunnanensis</i> Franch. | twig   | May.22, 2012 | 2468 | <i>Cinara pinea</i> (Mordvilko)                    | 6  | KP339585 |
| CHR073 | <i>Pinus yunnanensis</i> Franch. | twig   | May.23, 2012 | 2028 | <i>Cinara pinea</i> (Mordvilko)                    | 6  | KP339586 |
| CHR074 | <i>Pinus yunnanensis</i>         | twig   | May.23, 2012 | 2395 | <i>Cinara atrotibialis</i> David et                | 3  | KP339587 |



|        | Franch.                          |        |              |      | Rajasingh                                            |    |          |
|--------|----------------------------------|--------|--------------|------|------------------------------------------------------|----|----------|
| CHR075 | <i>Pinus armandi</i> Franch.     | twig   | May.24, 2012 | 2589 | <i>Cinara brevisaeta</i> Zhang, Zhang et Zhong       | 15 | KP339588 |
| CHR076 | <i>Pinus yunnanensis</i> Franch. | twig   | May.24, 2012 | 3200 | <i>Cinara</i> sp.                                    | 20 | KP339589 |
| CHR077 | <i>Tsuga</i> sp.                 | twig   | May.25, 2012 | 2960 | <i>Cinara</i> sp.                                    | 26 | KP339590 |
| CHR078 | <i>Pinus yunnanensis</i> Franch. | twig   | May.24, 2012 | 3200 | <i>Cinara atrotibialis</i> David et Rajasingh        | 3  | KP339591 |
| CHR079 | <i>Abies</i> sp.                 | twig   | May.24, 2012 | 2372 | <i>Cinara</i> sp.                                    | 27 | KP339592 |
| CHR080 | <i>Abies</i> sp.                 | twig   | May.24, 2012 | 3298 | <i>Cinara</i> sp.                                    | 28 | KP339593 |
| CHR081 | <i>Abies</i> sp.                 | twig   | May.25, 2012 | 2960 | <i>Cinara</i> sp.                                    | 29 | KP339594 |
| CHR082 | <i>Picea</i> sp.                 | branch | May.25, 2012 | 3224 | <i>Cinara</i> sp.                                    | 24 | KP339595 |
| CHR083 | <i>Picea</i> sp.                 | twig   | May.25, 2012 | 3258 | <i>Cinara pruiniviridis</i> Zhang, Chen, Zhong et Li | 17 | KP339596 |
| CHR084 | <i>Picea</i> sp.                 | twig   | May.25, 2012 | 3258 | <i>Cinara</i> sp.                                    | 2  | KP339597 |
| CHR085 | <i>Picea</i> sp.                 | twig   | May.25, 2012 | 3258 | <i>Cinara</i> sp.                                    | 30 | KP339598 |
| CHR086 | <i>Picea</i> sp.                 | twig   | May.25, 2012 | 3258 | <i>Cinara costata</i> (Zetterstedt)                  | 1  | KP339599 |
| CHR087 | <i>Picea</i> sp.                 | branch | May.25, 2012 | 3258 | <i>Cinara</i> sp.                                    | 24 | KP339600 |
| CHR088 | <i>Picea</i> sp.                 | twig   | May.25, 2012 | 3258 | <i>Cinara costata</i> (Zetterstedt)                  | 1  | KP339601 |
| CHR089 | <i>Picea</i> sp.                 | twig   | May.24, 2012 | 2982 | <i>Cinara costata</i> (Zetterstedt)                  | 1  | KP339602 |
| CHR090 | <i>Picea</i> sp.                 | twig   | May.25, 2012 | 3092 | <i>Cinara costata</i> (Zetterstedt)                  | 1  | KP339603 |
| CHR091 | <i>Abies</i> sp.                 | twig   | May.25, 2012 | 3092 | <i>Cinara</i> sp.                                    | 29 | KP339604 |
| CHR092 | <i>Picea</i> sp.                 | twig   | May.25, 2012 | 3224 | <i>Cinara pruiniviridis</i> Zhang, Chen, Zhong et Li | 17 | KP339605 |
| CHR093 | <i>Pinus yunnanensis</i> Franch. | twig   | May.26, 2012 | 2806 | <i>Cinara atrotibialis</i> David et Rajasingh        | 3  | KP339606 |

|        |                                              |        |              |      |                                                        |    |          |
|--------|----------------------------------------------|--------|--------------|------|--------------------------------------------------------|----|----------|
| CHR094 | <i>Picea</i> sp.                             | twig   | May.26, 2012 | 3137 | <i>Cinara costata</i> (Zetterstedt)                    | 1  | KP339607 |
| CHR095 | <i>Picea</i> sp.                             | branch | May.26, 2012 | 3137 | <i>Cinara</i> sp.                                      | 24 | KP339608 |
| CHR096 | <i>Picea</i> sp.                             | twig   | May.26, 2012 | 3137 | <i>Cinara pruinviridis</i> Zhang,<br>Chen, Zhong et Li | 17 | KP339609 |
| CHR097 | <i>Platycladus orientalis</i><br>(L.) Franco | twig   | May.26, 2012 | 2718 | <i>Cinara tujafilina</i> (del Guercio)                 | 9  | KP339610 |
| CHR098 | <i>Juniperus formosana</i><br>Hayata.        | twig   | May.27, 2012 | 2718 | <i>Cinara</i> sp.                                      | 7  | KP339611 |
| CHR099 | <i>Juniperus formosana</i><br>Hayata.        | twig   | May.27, 2012 | 2701 | <i>Cinara</i> sp.                                      | 18 | KP339612 |
| CHR100 | <i>Pinus yunnanensis</i><br>Franch.          | twig   | May.27, 2012 | 2701 | <i>Cinara pinea</i> (Mordvilko)                        | 6  | KP339613 |
| CHR101 | <i>Pinus yunnanensis</i><br>Franch.          | twig   | May.27, 2012 | 2786 | <i>Cinara atrotibialis</i> David et<br>Rajasingh       | 3  | KP339614 |
| CHR102 | <i>Picea</i> sp.                             | trunk  | May.27, 2012 | 2712 | <i>Cinara</i> sp.                                      | 24 | KP339615 |
| CHR103 | <i>Picea</i> sp.                             | branch | May.27, 2012 | 2712 | <i>Cinara</i> sp.                                      | 31 | KP339616 |
| CHR104 | <i>Pinus yunnanensis</i><br>Franch.          | twig   | May.27, 2012 | 3106 | <i>Cinara</i> sp.                                      | 32 | KP339617 |
| CHR105 | <i>Picea</i> sp.                             | twig   | May.27, 2012 | 3106 | <i>Cinara pruinviridis</i> Zhang,<br>Chen, Zhong et Li | 17 | KP339618 |
| CHR106 | <i>Picea</i> sp.                             | twig   | May.27, 2012 | 3106 | <i>Cinara costata</i> (Zetterstedt)                    | 1  | KP339619 |
| CHR107 | <i>Platycladus orientalis</i><br>(L.) Franco | twig   | May.26, 2012 | 2719 | <i>Cinara</i> sp.                                      | 21 | KP339620 |
| CHR108 | <i>Pinus yunnanensis</i><br>Franch.          | twig   | May.27, 2012 | 2949 | <i>Cinara atrotibialis</i> David et<br>Rajasingh       | 3  | KP339621 |
| CHR109 | <i>Picea likiangensis</i>                    | twig   | May.28, 2012 | 2787 | <i>Cinara pruinviridis</i> Zhang,                      | 17 | KP339622 |

|        | (Franch) Pritz                              |        |              |      | Chen, Zhong et Li                                      |    |          |
|--------|---------------------------------------------|--------|--------------|------|--------------------------------------------------------|----|----------|
| CHR110 | <i>Picea likiangensis</i><br>(Franch) Pritz | twig   | May.28, 2012 | 2787 | <i>Cinara</i> sp.                                      | 2  | KP339623 |
| CHR111 | <i>Abies</i> sp.                            | twig   | May.28, 2012 | 2787 | <i>Cinara</i> sp.                                      | 33 | KP339624 |
| CHR112 | <i>Picea</i> sp.                            | twig   | May.28, 2012 | 3282 | <i>Cinara pruinviridis</i> Zhang,<br>Chen, Zhong et Li | 17 | KP339625 |
| CHR113 | <i>Picea</i> sp.                            | twig   | May.28, 2012 | 3282 | <i>Cinara costata</i> (Zetterstedt)                    | 1  | KP339626 |
| CHR114 | <i>Pinus yunnanensis</i><br>Franch.         | twig   | May.28, 2012 | 3195 | <i>Cinara pinea</i> (Mordvilko)                        | 6  | KP339627 |
| CHR115 | <i>Pinus yunnanensis</i><br>Franch.         | trunk  | May.29, 2012 | 3195 | <i>Cinara largirostris</i> Zhang, Zhang<br>et Zhong    | 34 | KP339628 |
| CHR116 | <i>Picea</i> sp.                            | trunk  | May.29, 2012 | 3195 | <i>Cinara</i> sp.                                      | 24 | KP339629 |
| CHR117 | <i>Abies</i> sp.                            | twig   | May.29, 2012 | 3267 | <i>Cinara</i> sp.                                      | 35 | KP339630 |
| CHR118 | <i>Picea</i> sp.                            | twig   | May.29, 2012 | 3267 | <i>Cinara</i> sp.                                      | 36 | KP339631 |
| CHR119 | <i>Picea</i> sp.                            | twig   | May.29, 2012 | 3267 | <i>Cinara costata</i> (Zetterstedt)                    | 1  | KP339632 |
| CHR120 | <i>Larix</i> sp.                            | branch | May.29, 2012 | 3272 | <i>Cinara</i> sp.                                      | 37 | KP339633 |
| CHR121 | <i>Juniperus formosana</i><br>Hayata.       | twig   | May.29, 2012 | 3613 | <i>Cinara</i> sp.                                      | 38 | KP339634 |
| CHR122 | <i>Juniperus formosana</i><br>Hayata.       | twig   | May.29, 2012 | 3613 | <i>Cinara</i> sp.                                      | 39 | KP339635 |
| CHR123 | <i>Picea likiangensis</i><br>(Franch) Pritz | twig   | May.28, 2012 | 2786 | <i>Cinara costata</i> (Zetterstedt)                    | 1  | KP339636 |
| CHR124 | <i>Picea likiangensis</i><br>(Franch) Pritz | twig   | May.28, 2012 | 3309 | <i>Cinara</i> sp.                                      | 2  | KP339637 |
| CHR125 | <i>Picea</i> sp.                            | twig   | May.28, 2012 | 3282 | <i>Cinara costata</i> (Zetterstedt)                    | 1  | KP339638 |
| CHR126 | <i>Picea likiangensis</i>                   | twig   | May.30, 2012 | 2911 | <i>Cinara</i> sp.                                      | 40 | KP339639 |

|        |                                             |        |              |      |                                                     |    |          |
|--------|---------------------------------------------|--------|--------------|------|-----------------------------------------------------|----|----------|
|        | (Franch) Pritz                              |        |              |      |                                                     |    |          |
| CHR127 | <i>Tsuga</i> sp.                            | twig   | May.30, 2012 | 2832 | <i>Cinara</i> sp.                                   | 41 | KP339640 |
| CHR128 | <i>Tsuga</i> sp.                            | twig   | May.30, 2012 | 2832 | <i>Cinara</i> sp.                                   | 42 | KP339641 |
| CHR129 | <i>Pinus yunnanensis</i><br>Franch.         | twig   | May.30, 2012 | 2582 | <i>Cinara atrotibialis</i> David et<br>Rajasingh    | 3  | KP339642 |
| CHR130 | <i>Picea likiangensis</i><br>(Franch) Pritz | twig   | May.30, 2012 | 2910 | <i>Cinara</i> sp.                                   | 43 | KP339643 |
| CHR131 | <i>Picea likiangensis</i><br>(Franch) Pritz | branch | May.30, 2012 | 2910 | <i>Cinara</i> sp.                                   | 36 | KP339644 |
| CHR132 | <i>Picea likiangensis</i><br>(Franch) Pritz | twig   | May.30, 2012 | 2910 | <i>Cinara</i> sp.                                   | 44 | KP339645 |
| CHR133 | <i>Picea likiangensis</i><br>(Franch) Pritz | twig   | May.30, 2012 | 2910 | <i>Cinara costata</i> (Zetterstedt)                 | 1  | KP339646 |
| CHR134 | <i>Pinus yunnanensis</i><br>Franch.         | branch | May.30, 2012 | 2832 | <i>Cinara largirostris</i> Zhang, Zhang<br>et Zhong | 34 | KP339647 |
| CHR135 | <i>Pinus yunnanensis</i><br>Franch.         | twig   | May.31, 2012 | 2832 | <i>Cinara atrotibialis</i> David et<br>Rajasingh    | 3  | KP339648 |
| CHR136 | <i>Pinus yunnanensis</i><br>Franch.         | twig   | May.31, 2012 | 2461 | <i>Cinara pinea</i> (Mordvilko)                     | 6  | KP339649 |
| CHR137 | <i>Pinus yunnanensis</i><br>Franch.         | branch | May.31, 2012 | 2461 | <i>Cinara largirostris</i> Zhang, Zhang<br>et Zhong | 34 | KP339650 |
| CHR138 | <i>Abies</i> sp.                            | twig   | May.31, 2012 | 2732 | <i>Cinara</i> sp.                                   | 45 | KP339651 |
| CHR139 | <i>Pinus yunnanensis</i><br>Franch.         | twig   | May.31, 2012 | 1875 | <i>Cinara pinea</i> (Mordvilko)                     | 6  | KP339652 |
| CHR140 | <i>Tsuga</i> sp.                            | twig   | Jun.1, 2012  | 3264 | <i>Cinara</i> sp.                                   | 46 | KP339653 |
| CHR141 | <i>Tsuga</i> sp.                            | twig   | Jun.1, 2012  | 3264 | <i>Cinara</i> sp.                                   | 41 | KP339654 |

|        |                                  |        |              |      |                                                    |    |          |
|--------|----------------------------------|--------|--------------|------|----------------------------------------------------|----|----------|
| CHR142 | <i>Pinus armandi</i> Franch.     | branch | Jun.1, 2012  | 3264 | <i>Cinara piniarmandicola</i> Zhang, Zhang & Zhong | 5  | KP339655 |
| CHR143 | <i>Abies delavayi</i> Franch.    | twig   | Jun.1, 2012  | 3264 | <i>Cinara</i> sp.                                  | 47 | KP339656 |
| CHR144 | <i>Abies delavayi</i> Franch.    | twig   | Jun.1, 2012  | 3264 | <i>Cinara</i> sp.                                  | 48 | KP339657 |
| CHR145 | <i>Abies</i> sp.                 | twig   | Jun.1, 2012  | 3260 | <i>Cinara</i> sp.                                  | 49 | KP339658 |
| CHR146 | <i>Pinus yunnanensis</i> Franch. | twig   | Jun.1, 2012  | 2019 | <i>Cinara atrotibialis</i> David et Rajasingh      | 3  | KP339659 |
| CHR147 | <i>Pinus yunnanensis</i> Franch. | twig   | Jun.2, 2012  | 2019 | <i>Cinara pinea</i> (Mordvilko)                    | 6  | KP339660 |
| CHR148 | <i>Picea</i> sp.                 | twig   | Jun.20, 2012 | 2620 | <i>Cinara</i> sp.                                  | 50 | KP339661 |
| CHR149 | <i>Abies</i> sp.                 | twig   | Jun.20, 2012 | 2844 | <i>Cinara</i> sp.                                  | 51 | KP339662 |
| CHR150 | <i>Abies</i> sp.                 | twig   | Jun.20, 2012 | 2844 | <i>Cinara</i> sp.                                  | 52 | KP339663 |
| CHR151 | <i>Abies</i> sp.                 | twig   | Jun.20, 2012 | 2844 | <i>Cinara</i> sp.                                  | 51 | KP339664 |
| CHR152 | <i>Picea</i> sp.                 | twig   | Jun.20, 2012 | 2844 | <i>Cinara</i> sp.                                  | 50 | KP339665 |
| CHR153 | <i>Picea wilsonii</i> Mast       | twig   | Jun.20, 2012 | 2844 | <i>Cinara</i> sp.                                  | 53 | KP339666 |
| CHR154 | <i>Abies</i> sp.                 | twig   | Jun.20, 2012 | 2842 | <i>Cinara</i> sp.                                  | 54 | KP339667 |
| CHR155 | <i>Picea</i> sp.                 | twig   | Jun.20, 2012 | 2842 | <i>Cinara</i> sp.                                  | 55 | KP339668 |
| CHR156 | <i>Pinus tabuliformis</i> Carr.  | twig   | Jun.21, 2012 | 2376 | <i>Cinara</i> sp.                                  | 22 | KP339669 |
| CHR157 | <i>Larix</i> sp.                 | branch | Jun.21, 2012 | 2844 | <i>Cinara cuneomaculata</i> (del Guercio)          | 11 | KP339670 |
| CHR158 | <i>Pinus armandi</i> Franch.     | branch | Jun.21, 2012 | 2844 | <i>Cinara piniarmandicola</i> Zhang, Zhang & Zhong | 5  | KP339671 |
| CHR159 | <i>Abies</i> sp.                 | twig   | Jun.22, 2012 | 2961 | <i>Cinara</i> sp.                                  | 56 | KP339672 |
| CHR160 | <i>Picea</i> sp.                 | twig   | Jun.22, 2012 | 2961 | <i>Cinara</i> sp.                                  | 50 | KP339673 |
| CHR161 | <i>Picea</i> sp.                 | twig   | Jun.22, 2012 | 2754 | <i>Cinara</i> sp.                                  | 23 | KP339674 |

|        |                                              |        |              |      |                                                  |    |          |
|--------|----------------------------------------------|--------|--------------|------|--------------------------------------------------|----|----------|
| CHR162 | <i>Picea</i> sp.                             | twig   | Jun.22, 2012 | 2754 | <i>Cinara</i> sp.                                | 23 | KP339675 |
| CHR163 | <i>Picea</i> sp.                             | twig   | Jun.23, 2012 | 2611 | <i>Cinara</i> sp.                                | 50 | KP339676 |
| CHR164 | <i>Platycladus orientalis</i><br>(L.) Franco | twig   | Jun.26, 2012 | 1500 | <i>Cinara tujafilina</i> (del Guercio)           | 9  | KP339677 |
| CHR165 | <i>Pinus tabuliformis</i> Carr.              | twig   | Jun.26, 2012 | 1670 | <i>Cinara</i> sp.                                | 22 | KP339678 |
| CHR166 | <i>Pinus tabuliformis</i> Carr.              | twig   | Jun.27, 2012 | 1731 | <i>Cinara</i> sp.                                | 22 | KP339679 |
| CHR167 | <i>Larix</i> sp.                             | branch | Jun.27, 2012 | 1731 | <i>Cinara cuneomaculata</i> (del Guercio)        | 11 | KP339680 |
| CHR168 | <i>Picea</i> sp.                             | twig   | Jun.27, 2012 | 2054 | <i>Cinara</i> sp.                                | 23 | KP339681 |
| CHR169 | <i>Pinus armandi</i> Franch.                 | twig   | Jun.27, 2012 | 1731 | <i>Cinara</i> sp.                                | 57 | KP339682 |
| CHR170 | <i>Picea</i> sp.                             | branch | Aug.9, 2012  | 4082 | <i>Cinara</i> sp.                                | 24 | KP339683 |
| CHR171 | <i>Picea</i> sp.                             | twig   | Aug.9, 2012  | 4082 | <i>Cinara</i> sp.                                | 58 | KP339684 |
| CHR172 | <i>Abies</i> sp.                             | twig   | Jul.26, 2012 | 3419 | <i>Cinara</i> sp.                                | 59 | KP339685 |
| CHR173 | <i>Abies</i> sp.                             | twig   | Jul.26, 2012 | 3419 | <i>Cinara</i> sp.                                | 8  | KP339686 |
| CHR174 | <i>Picea</i> sp.                             | twig   | Jul.18, 2012 | 4230 | <i>Cinara</i> sp.                                | 60 | KP339687 |
| CHR175 | <i>Picea</i> sp.                             | twig   | Jul.18, 2012 | 4230 | <i>Cinara</i> sp.                                | 61 | KP339688 |
| CHR176 | <i>Juniperus formosana</i><br>Hayata.        | twig   | Jul.22, 2012 | 4069 | <i>Cinara</i> sp.                                | 62 | KP339689 |
| CHR177 | Cupressaceae                                 | twig   | Aug.13, 2012 | 3747 | <i>Cinara</i> sp.                                | 63 | KP339690 |
| CHR178 | <i>Picea</i> sp.                             | twig   | Aug.13, 2012 | 3747 | <i>Cinara</i> sp.                                | 64 | KP339691 |
| CHR179 | <i>Abies</i> sp.                             | twig   | Aug.2, 2012  | 3419 | <i>Cinara</i> sp.                                | 65 | KP339692 |
| CHR180 | <i>Abies</i> sp.                             | twig   | Aug.2, 2012  | 3419 | <i>Cinara</i> sp.                                | 65 | KP339693 |
| CHR181 | <i>Larix</i> sp.                             | branch | Jul.11, 2012 | 2977 | <i>Cinara</i> sp.                                | 66 | KP339694 |
| CHR182 | <i>Pinus tabuliformis</i> Carr.              | branch | Jul.25, 2012 | 2461 | <i>Cinara largirostris</i> Zhang, Zhang et Zhong | 34 | KP339695 |

|        |                                      |        |              |      |                                   |    |          |
|--------|--------------------------------------|--------|--------------|------|-----------------------------------|----|----------|
| CHR183 | <i>Abies</i> sp.                     | twig   | Jul.11, 2012 | 2977 | <i>Cinara</i> sp.                 | 67 | KP339696 |
| CHR184 | <i>Abies</i> sp.                     | twig   | Jul.9, 2012  | 3340 | <i>Cinara</i> sp.                 | 67 | KP339697 |
| CHR185 | <i>Abies</i> sp.                     | twig   | Jul.9, 2012  | 3340 | <i>Cinara</i> sp.                 | 68 | KP339698 |
| CHR186 | <i>Abies</i> sp.                     | twig   | Jul.9, 2012  | 3340 | <i>Cinara</i> sp.                 | 67 | KP339699 |
| CHR187 | <i>Abies</i> sp.                     | twig   | Jul.24, 2012 | 4571 | <i>Cinara</i> sp.                 | 69 | KP339700 |
| CHR188 | <i>Abies</i> sp.                     | twig   | Jul.24, 2012 | 4571 | <i>Cinara</i> sp.                 | 69 | KP339701 |
| CHR189 | <i>Picea</i> sp.                     | twig   | Aug.12, 2012 | 4668 | <i>Cinara</i> sp.                 | 70 | KP339702 |
| CHR190 | <i>Picea</i> sp.                     | twig   | Aug.12, 2012 | 4668 | <i>Cinara</i> sp.                 | 61 | KP339703 |
| CHR191 | <i>Picea</i> sp.                     | branch | Jul.14, 2012 | 3369 | <i>Cinara</i> sp.                 | 24 | KP339704 |
| CHR192 | <i>Picea brachytyla</i><br>(Franch.) | twig   | Aug.5, 2013  | 2595 | <i>Cinara</i> sp.                 | 71 | KP339705 |
| CHR193 | <i>Picea brachytyla</i><br>(Franch.) | twig   | Aug.5, 2013  | 2595 | <i>Cinara</i> sp.                 | 2  | KP339706 |
| CHR194 | <i>Picea brachytyla</i><br>(Franch.) | twig   | Aug.5, 2013  | 2595 | <i>Cinara</i> sp.                 | 72 | KP339707 |
| CHR195 | <i>Picea brachytyla</i><br>(Franch.) | trunk  | Aug.5, 2013  | 2595 | <i>Cinara</i> sp.                 | 24 | KP339708 |
| CHR196 | <i>Picea brachytyla</i><br>(Franch.) | twig   | Aug.5, 2013  | 2860 | <i>Cinara</i> sp.                 | 72 | KP339709 |
| CHR197 | <i>Larix</i> sp.                     | branch | Aug.5, 2013  | 2860 | <i>Cinara</i> sp.                 | 66 | KP339710 |
| CHR198 | <i>Picea brachytyla</i><br>(Franch.) | twig   | Aug.5, 2013  | 2860 | <i>Cinara</i> sp.                 | 2  | KP339711 |
| CHR199 | <i>Tsuga</i> sp.                     | twig   | Aug.5, 2013  | 2860 | <i>Cinara</i> sp.                 | 73 | KP339712 |
| CHR200 | <i>Larix</i> sp.                     | branch | Aug.6, 2013  | 3086 | <i>Cinara</i> sp.                 | 66 | KP339713 |
| CHR201 | <i>Picea</i> sp.                     | twig   | Aug.6, 2013  | 3086 | <i>Cinara pilicornis</i> (Hartig) | 10 | KP339714 |
| CHR202 | <i>Picea</i> sp.                     | twig   | Aug.6, 2013  | 3086 | <i>Cinara pilicornis</i> (Hartig) | 10 | KP339715 |

|        |                                      |        |             |      |                                                        |    |          |
|--------|--------------------------------------|--------|-------------|------|--------------------------------------------------------|----|----------|
| CHR203 | <i>Picea</i> sp.                     | twig   | Aug.6, 2013 | 3086 | <i>Cinara</i> sp.                                      | 2  | KP339716 |
| CHR204 | <i>Picea brachytyla</i><br>(Franch.) | twig   | Aug.6, 2013 | 2690 | <i>Cinara pruinviridis</i> Zhang,<br>Chen, Zhong et Li | 17 | KP339717 |
| CHR205 | <i>Pinus armandi</i> Franch.         | branch | Aug.7, 2013 | 2761 | <i>Cinara piniarmandicola</i> Zhang,<br>Zhang & Zhong  | 5  | KP339718 |
| CHR206 | <i>Picea</i> sp.                     | twig   | Aug.7, 2013 | 2849 | <i>Cinara</i> sp.                                      | 50 | KP339719 |
| CHR207 | <i>Picea</i> sp.                     | twig   | Aug.7, 2013 | 2849 | <i>Cinara pilicornis</i> (Hartig)                      | 10 | KP339720 |
| CHR208 | <i>Picea</i> sp.                     | twig   | Aug.7, 2013 | 2849 | <i>Cinara</i> sp.                                      | 74 | KP339721 |
| CHR209 | <i>Picea</i> sp.                     | twig   | Aug.8, 2013 | 3880 | <i>Cinara</i> sp.                                      | 75 | KP339722 |
| CHR210 | <i>Picea</i> sp.                     | twig   | Aug.8, 2013 | 3880 | <i>Cinara</i> sp.                                      | 64 | KP339723 |
| CHR211 | <i>Picea</i> sp.                     | twig   | Aug.8, 2013 | 3880 | <i>Cinara</i> sp.                                      | 76 | KP339724 |
| CHR212 | <i>Picea</i> sp.                     | twig   | Aug.8, 2013 | 3880 | <i>Cinara</i> sp.                                      | 77 | KP339725 |
| CHR213 | <i>Picea</i> sp.                     | branch | Aug.8, 2013 | 3880 | <i>Cinara</i> sp.                                      | 24 | KP339726 |
| CHR214 | <i>Picea</i> sp.                     | twig   | Aug.8, 2013 | 3880 | <i>Cinara</i> sp.                                      | 78 | KP339727 |
| CHR215 | <i>Larix</i> sp.                     | branch | Aug.8, 2013 | 3369 | <i>Cinara</i> sp.                                      | 79 | KP339728 |
| CHR216 | <i>Picea</i> sp.                     | twig   | Aug.8, 2013 | 4308 | <i>Cinara</i> sp.                                      | 61 | KP339729 |
| CHR217 | <i>Picea</i> sp.                     | branch | Aug.9, 2013 | 3930 | <i>Cinara</i> sp.                                      | 24 | KP339730 |
| CHR218 | <i>Picea</i> sp.                     | twig   | Aug.9, 2013 | 3930 | <i>Cinara</i> sp.                                      | 64 | KP339731 |
| CHR219 | <i>Larix</i> sp.                     | branch | Aug.9, 2013 | 4036 | <i>Cinara</i> sp.                                      | 79 | KP339732 |
| CHR220 | <i>Picea</i> sp.                     | twig   | Aug.9, 2013 | 4036 | <i>Cinara</i> sp.                                      | 80 | KP339733 |
| CHR221 | <i>Picea</i> sp.                     | branch | Aug.9, 2013 | 4036 | <i>Cinara</i> sp.                                      | 24 | KP339734 |
| CHR222 | <i>Picea</i> sp.                     | twig   | Aug.9, 2013 | 4036 | <i>Cinara</i> sp.                                      | 75 | KP339735 |
| CHR223 | Cupressaceae                         | twig   | Aug.9, 2013 | 4036 | <i>Cinara</i> sp.                                      | 62 | KP339736 |
| CHR224 | <i>Pinus massoniana</i><br>Lamb.     | twig   | Aug.9, 2013 | 3612 | <i>Cinara</i> sp.                                      | 81 | KP339737 |



|        |                                  |        |              |      |                                                            |    |          |
|--------|----------------------------------|--------|--------------|------|------------------------------------------------------------|----|----------|
| CHR225 | <i>Pinus massoniana</i><br>Lamb. | twig   | Aug.10, 2013 | 3160 | <i>Cinara</i> sp.                                          | 81 | KP339738 |
| CHR226 | <i>Pinus massoniana</i><br>Lamb. | twig   | Aug.10, 2013 | 3160 | <i>Cinara atrotibialis</i> David <i>et</i><br>Rajasingh    | 3  | KP339739 |
| CHR227 | <i>Pinus massoniana</i><br>Lamb. | branch | Aug.10, 2013 | 3753 | <i>Cinara largirostris</i> Zhang, Zhang<br><i>et</i> Zhong | 34 | KP339740 |
| CHR228 | <i>Larix</i> sp.                 | branch | Aug.10, 2013 | 4106 | <i>Cinara</i> sp.                                          | 37 | KP339741 |
| CHR229 | <i>Abies</i> sp.                 | twig   | Aug.10, 2013 | 4333 | <i>Cinara</i> sp.                                          | 51 | KP339742 |
| CHR230 | <i>Abies</i> sp.                 | twig   | Aug.10, 2013 | 4333 | <i>Cinara</i> sp.                                          | 51 | KP339743 |
| CHR231 | <i>Abies</i> sp.                 | twig   | Aug.10, 2013 | 4333 | <i>Cinara</i> sp.                                          | 51 | KP339744 |
| CHR232 | Cupressaceae                     | twig   | Aug.10, 2013 | 4188 | <i>Cinara</i> sp.                                          | 62 | KP339745 |
| CHR233 | <i>Pinus armandi</i> Franch.     | trunk  | Aug.10, 2013 | 3029 | <i>Cinara piniarmandicola</i> Zhang,<br>Zhang & Zhong      | 5  | KP339746 |
| CHR234 | Cupressaceae                     | twig   | Aug.11, 2013 | 3180 | <i>Cinara tujafilina</i> (del Guercio)                     | 9  | KP339747 |
| CHR235 | <i>Larix</i> sp.                 | branch | Aug.12, 2013 | 3799 | <i>Cinara</i> sp.                                          | 79 | KP339748 |
| CHR236 | <i>Larix</i> sp.                 | branch | Aug.12, 2013 | 3799 | <i>Cinara</i> sp.                                          | 37 | KP339749 |
| CHR237 | <i>Picea</i> sp.                 | twig   | Aug.12, 2013 | 3933 | <i>Cinara</i> sp.                                          | 75 | KP339750 |
| CHR238 | <i>Picea</i> sp.                 | twig   | Aug.12, 2013 | 3933 | <i>Cinara</i> sp.                                          | 80 | KP339751 |
| CHR239 | Cupressaceae                     | twig   | Aug.12, 2013 | 3933 | <i>Cinara</i> sp.                                          | 62 | KP339752 |
| CHR240 | <i>Larix</i> sp.                 | branch | Aug.12, 2013 | 3933 | <i>Cinara</i> sp.                                          | 37 | KP339753 |
| CHR241 | <i>Abies</i> sp.                 | twig   | Aug.12, 2013 | 3933 | <i>Cinara</i> sp.                                          | 76 | KP339754 |
| CHR242 | <i>Picea</i> sp.                 | branch | Aug.12, 2013 | 4153 | <i>Cinara</i> sp.                                          | 24 | KP339755 |
| CHR243 | <i>Picea</i> sp.                 | twig   | Aug.12, 2013 | 4153 | <i>Cinara</i> sp.                                          | 76 | KP339756 |
| CHR244 | <i>Abies</i> sp.                 | twig   | Aug.12, 2013 | 3840 | <i>Cinara</i> sp.                                          | 77 | KP339757 |
| CHR245 | <i>Picea</i> sp.                 | twig   | Aug.12, 2013 | 3840 | <i>Cinara</i> sp.                                          | 23 | KP339758 |

|        |                  |        |              |      |                                   |    |          |
|--------|------------------|--------|--------------|------|-----------------------------------|----|----------|
| CHR246 | <i>Picea</i> sp. | twig   | Aug.12, 2013 | 3840 | <i>Cinara</i> sp.                 | 76 | KP339759 |
| CHR247 | <i>Picea</i> sp. | twig   | Aug.12, 2013 | 3840 | <i>Cinara</i> sp.                 | 77 | KP339760 |
| CHR248 | <i>Picea</i> sp. | twig   | Aug.12, 2013 | 3840 | <i>Cinara</i> sp.                 | 77 | KP339761 |
| CHR249 | <i>Abies</i> sp. | twig   | Aug.13, 2013 | 3174 | <i>Cinara</i> sp.                 | 82 | KP339762 |
| CHR250 | <i>Picea</i> sp. | branch | Aug.13, 2013 | 3174 | <i>Cinara</i> sp.                 | 24 | KP339763 |
| CHR251 | <i>Picea</i> sp. | twig   | Aug.14, 2013 | 4035 | <i>Cinara pilicornis</i> (Hartig) | 10 | KP339764 |
| CHR252 | <i>Picea</i> sp. | twig   | Aug.14, 2013 | 4035 | <i>Cinara</i> sp.                 | 2  | KP339765 |
| CHR253 | <i>Picea</i> sp. | twig   | Aug.14, 2013 | 4035 | <i>Cinara pilicornis</i> (Hartig) | 10 | KP339766 |
| CHR254 | <i>Picea</i> sp. | twig   | Aug.14, 2013 | 4035 | <i>Cinara</i> sp.                 | 75 | KP339767 |
| CHR255 | Cupressaceae     | twig   | Aug.14, 2013 | 4315 | <i>Cinara</i> sp.                 | 62 | KP339768 |
| CHR256 | <i>Picea</i> sp. | twig   | Aug.15, 2013 | 4018 | <i>Cinara</i> sp.                 | 83 | KP339769 |
| CHR257 | <i>Picea</i> sp. | twig   | Aug.15, 2013 | 4018 | <i>Cinara</i> sp.                 | 75 | KP339770 |
| CHR258 | <i>Picea</i> sp. | branch | Aug.15, 2013 | 4018 | <i>Cinara</i> sp.                 | 24 | KP339771 |
| CHR259 | <i>Picea</i> sp. | branch | Aug.15, 2013 | 4035 | <i>Cinara</i> sp.                 | 24 | KP339772 |
| CHR260 | <i>Picea</i> sp. | twig   | Aug.16, 2013 | 3421 | <i>Cinara</i> sp.                 | 50 | KP339773 |
| CHR261 | <i>Picea</i> sp. | twig   | Aug.16, 2013 | 3421 | <i>Cinara</i> sp.                 | 74 | KP339774 |
| CHR262 | <i>Picea</i> sp. | twig   | Aug.16, 2013 | 3451 | <i>Cinara pilicornis</i> (Hartig) | 10 | KP339775 |
| CHR263 | <i>Picea</i> sp. | twig   | Aug.16, 2013 | 3451 | <i>Cinara</i> sp.                 | 64 | KP339776 |
| CHR264 | <i>Picea</i> sp. | twig   | Aug.16, 2013 | 3451 | <i>Cinara pilicornis</i> (Hartig) | 10 | KP339777 |
| CHR265 | <i>Picea</i> sp. | twig   | Aug.16, 2013 | 3760 | <i>Cinara</i> sp.                 | 61 | KP339778 |
| CHR266 | <i>Picea</i> sp. | twig   | Aug.16, 2013 | 3760 | <i>Cinara</i> sp.                 | 84 | KP339779 |
| CHR267 | <i>Picea</i> sp. | twig   | Aug.16, 2013 | 4178 | <i>Cinara</i> sp.                 | 2  | KP339780 |
| CHR268 | <i>Abies</i> sp. | twig   | Aug.17, 2013 | 2883 | <i>Cinara</i> sp.                 | 85 | KP339781 |
| CHR269 | <i>Picea</i> sp. | branch | Aug.17, 2013 | 2883 | <i>Cinara</i> sp.                 | 24 | KP339782 |
| CHR270 | <i>Picea</i> sp. | twig   | Aug.17, 2013 | 2917 | <i>Cinara</i> sp.                 | 50 | KP339783 |

|        |                                      |        |              |      |                                   |    |          |
|--------|--------------------------------------|--------|--------------|------|-----------------------------------|----|----------|
| CHR271 | <i>Picea</i> sp.                     | twig   | Aug.17, 2013 | 2917 | <i>Cinara</i> sp.                 | 74 | KP339784 |
| CHR272 | <i>Picea</i> sp.                     | twig   | Aug.17, 2013 | 2917 | <i>Cinara pilicornis</i> (Hartig) | 10 | KP339785 |
| CHR273 | <i>Picea</i> sp.                     | twig   | Aug.17, 2013 | 2917 | <i>Cinara pilicornis</i> (Hartig) | 10 | KP339786 |
| CHR274 | Cupressaceae                         | twig   | Aug.17, 2013 | 4145 | <i>Cinara</i> sp.                 | 7  | KP339787 |
| CHR275 | <i>Abies</i> sp.                     | twig   | Aug.18, 2013 | 3753 | <i>Cinara</i> sp.                 | 86 | KP339788 |
| CHR276 | <i>Picea brachytyla</i><br>(Franch.) | twig   | Aug.18, 2013 | 3767 | <i>Cinara</i> sp.                 | 87 | KP339789 |
| CHR277 | <i>Picea brachytyla</i><br>(Franch.) | twig   | Aug.18, 2013 | 3767 | <i>Cinara</i> sp.                 | 87 | KP339790 |
| CHR278 | <i>Picea</i> sp.                     | twig   | Aug.18, 2013 | 3454 | <i>Cinara</i> sp.                 | 50 | KP339791 |
| CHR279 | <i>Picea</i> sp.                     | twig   | Aug.18, 2013 | 3454 | <i>Cinara</i> sp.                 | 74 | KP339792 |
| CHR280 | <i>Picea brachytyla</i><br>(Franch.) | twig   | Aug.18, 2013 | 3915 | <i>Cinara</i> sp.                 | 83 | KP339793 |
| CHR281 | <i>Picea brachytyla</i><br>(Franch.) | twig   | Aug.18, 2013 | 3915 | <i>Cinara</i> sp.                 | 2  | KP339794 |
| CHR282 | <i>Picea brachytyla</i><br>(Franch.) | twig   | Aug.18, 2013 | 3915 | <i>Cinara</i> sp.                 | 88 | KP339795 |
| CHR283 | <i>Picea</i> sp.                     | twig   | Aug.19, 2013 | 3913 | <i>Cinara</i> sp.                 | 23 | KP339796 |
| CHR284 | <i>Picea</i> sp.                     | twig   | Aug.19, 2013 | 3913 | <i>Cinara pilicornis</i> (Hartig) | 10 | KP339797 |
| CHR285 | <i>Picea</i> sp.                     | twig   | Aug.20, 2013 | 2682 | <i>Cinara</i> sp.                 | 50 | KP339798 |
| CHR286 | <i>Picea</i> sp.                     | branch | Aug.20, 2013 | 2682 | <i>Cinara</i> sp.                 | 55 | KP339799 |
| CHR287 | <i>Picea</i> sp.                     | branch | Aug.20, 2013 | 2682 | <i>Cinara</i> sp.                 | 89 | KP339800 |
| CHR288 | Cupressaceae                         | twig   | Aug.20, 2013 | 2682 | <i>Cinara</i> sp.                 | 7  | KP339801 |
| CHR289 | <i>Abies</i> sp.                     | twig   | Aug.20, 2013 | 3522 | <i>Cinara</i> sp.                 | 90 | KP339802 |
| CHR290 | <i>Abies</i> sp.                     | twig   | Aug.20, 2013 | 3522 | <i>Cinara</i> sp.                 | 91 | KP339803 |

|        |                                      |        |              |      |                                                       |    |          |
|--------|--------------------------------------|--------|--------------|------|-------------------------------------------------------|----|----------|
| CHR291 | <i>Picea</i> sp.                     | branch | Aug.20, 2013 | 3000 | <i>Cinara</i> sp.                                     | 74 | KP339804 |
| CHR292 | <i>Picea</i> sp.                     | twig   | Aug.20, 2013 | 3000 | <i>Cinara</i> sp.                                     | 50 | KP339805 |
| CHR293 | Cupressaceae                         | branch | Aug.20, 2013 | 3000 | <i>Cinara</i> sp.                                     | 7  | KP339806 |
| CHR294 | <i>Larix</i> sp.                     | branch | Aug.20, 2013 | 2897 | <i>Cinara</i> sp.                                     | 92 | KP339807 |
| CHR295 | Cupressaceae                         | twig   | Aug.20, 2013 | 2328 | <i>Cinara</i> sp.                                     | 7  | KP339808 |
| CHR296 | <i>Picea</i> sp.                     | twig   | Aug.21, 2013 | 2313 | <i>Cinara pilicornis</i> (Hartig)                     | 10 | KP339809 |
| CHR297 | <i>Pinus armandi</i> Franch.         | branch | Aug.21, 2013 | 2313 | <i>Cinara piniarmandicola</i> Zhang,<br>Zhang & Zhong | 5  | KP339810 |
| CHR298 | <i>Picea</i> sp.                     | twig   | Aug.22, 2013 | 3524 | <i>Cinara</i> sp.                                     | 50 | KP339811 |
| CHR299 | <i>Picea brachytyla</i><br>(Franch.) | twig   | Aug.22, 2013 | 3524 | <i>Cinara</i> sp.                                     | 93 | KP339812 |
| CHR300 | <i>Picea brachytyla</i><br>(Franch.) | twig   | Aug.22, 2013 | 3524 | <i>Cinara</i> sp.                                     | 23 | KP339813 |
| CHR301 | <i>Picea brachytyla</i><br>(Franch.) | twig   | Aug.22, 2013 | 3524 | <i>Cinara</i> sp.                                     | 93 | KP339814 |
| CHR302 | <i>Abies</i> sp.                     | twig   | Aug.22, 2013 | 3524 | <i>Cinara</i> sp.                                     | 94 | KP339815 |
| CHR303 | <i>Abies</i> sp.                     | twig   | Aug.22, 2013 | 3524 | <i>Cinara</i> sp.                                     | 91 | KP339816 |
| CHR304 | <i>Pinus armandi</i> Franch.         | branch | Aug.23, 2013 | 2335 | <i>Cinara piniarmandicola</i> Zhang,<br>Zhang & Zhong | 5  | KP339817 |



**Table S3.** Altitudinal range of *Cinara* species/candidate species in the mountains of southwest China

| Number of species/candidate species | Altitude range (m) |
|-------------------------------------|--------------------|
| 1                                   | 2500-4500          |
| 2                                   | 2500-4500          |
| 3                                   | 1500-4000          |
| 4                                   | 3000-4000          |
| 5                                   | 1200-3800          |
| 6                                   | 1500-4000          |
| 7                                   | 2000-5000          |
| 8                                   | 3000-4000          |
| 9                                   | 0-3500             |
| 10                                  | 1500-4200          |
| 11                                  | 1500-4000          |
| 12                                  | 2000-3000          |
| 13                                  | 1500-4000          |
| 14                                  | 1500-4000          |
| 15                                  | 2000-3000          |
| 16                                  | 3000-4000          |
| 17                                  | 2500-4000          |
| 18                                  | 2000-3000          |
| 19                                  | 3000-4000          |
| 20                                  | 2800-4000          |
| 21                                  | 2000-3000          |
| 22                                  | 1000-3000          |
| 23                                  | 2000-4000          |
| 24                                  | 1500-4200          |
| 25                                  | 1500-2500          |
| 26                                  | 2500-3500          |
| 27                                  | 2000-3500          |
| 28                                  | 2000-3500          |
| 29                                  | 2000-3500          |
| 30                                  | 2000-3500          |
| 31                                  | 2000-3500          |
| 32                                  | 2000-3500          |
| 33                                  | 2000-3500          |
| 34                                  | 2000-4000          |
| 35                                  | 2500-3500          |
| 36                                  | 2500-3500          |
| 37                                  | 2500-4500          |
| 38                                  | 3000-4200          |
| 39                                  | 3000-4200          |
| 40                                  | 2500-4000          |

|    |           |
|----|-----------|
| 41 | 2500-3500 |
| 42 | 2500-3500 |
| 44 | 2500-4000 |
| 45 | 2500-4000 |
| 46 | 2500-3500 |
| 46 | 2500-4000 |
| 47 | 2500-4000 |
| 48 | 2500-4000 |
| 49 | 2500-4000 |
| 50 | 2500-4000 |
| 51 | 2500-4800 |
| 52 | 2500-4000 |
| 53 | 2500-4000 |
| 54 | 2500-4000 |
| 55 | 2500-4000 |
| 56 | 2500-4000 |
| 57 | 1200-3800 |
| 58 | 3000-4500 |
| 59 | 3000-4000 |
| 60 | 3500-5000 |
| 61 | 3000-5000 |
| 62 | 3500-4800 |
| 63 | 3000-4200 |
| 64 | 3000-4200 |
| 65 | 3000-4200 |
| 66 | 2500-4000 |
| 67 | 2500-4000 |
| 68 | 2500-4000 |
| 69 | 4000-5000 |
| 70 | 4000-5000 |
| 71 | 2000-3500 |
| 72 | 2000-3500 |
| 73 | 2000-3500 |
| 74 | 2500-4000 |
| 75 | 3200-4500 |
| 76 | 3200-4500 |
| 77 | 3200-4500 |
| 78 | 3200-4500 |
| 79 | 3000-4500 |
| 80 | 3200-4500 |
| 81 | 2500-4000 |
| 82 | 2500-4200 |
| 83 | 3200-4500 |

|    |           |
|----|-----------|
| 84 | 3200-4500 |
| 85 | 2500-4200 |
| 86 | 3000-4200 |
| 87 | 3000-4200 |
| 88 | 3000-4200 |
| 89 | 2000-4000 |
| 90 | 3000-4500 |
| 91 | 3000-4500 |
| 92 | 2000-4000 |
| 93 | 3000-4200 |
| 94 | 3000-4200 |





**Table S4.** The species information and GenBank accession numbers of *Cinara* downloaded from GenBank Fr:France, US: United States of America, KZ: Kazakhstan, It: Italy, Gr:Greece, Al: Algeria ( Jousselin et al. 2013)

| Voucher | Genus         | Species               | Host genus    | Location                  | Feeding site recorded in the field | COI      |
|---------|---------------|-----------------------|---------------|---------------------------|------------------------------------|----------|
| 2956    | <i>Cinara</i> | <i>anelia</i>         | <i>Pinus</i>  | California (US)           | branch                             | KF649467 |
| 2961    | <i>Cinara</i> | <i>anelia</i>         | <i>Pinus</i>  | California (US)           | branch                             | KF649469 |
| 2967    | <i>Cinara</i> | <i>anelia</i>         | <i>Pinus</i>  | California (US)           | branch                             | KF649472 |
| 2920    | <i>Cinara</i> | <i>apini</i>          | <i>Pinus</i>  | New-Mexico (US)           | branch                             | KF649451 |
| 2865    | <i>Cinara</i> | <i>apini</i>          | <i>Pinus</i>  | Colorado (US)             | branch                             | KF649403 |
| 2995    | <i>Cinara</i> | <i>arizonica</i>      | <i>Pinus</i>  | California (US)           | branch                             | KF649487 |
| 3044    | <i>Cinara</i> | <i>arizonica</i>      | <i>Pinus</i>  | Oregon (US)               | branch                             | KF649514 |
| 463     | <i>Cinara</i> | <i>brauni</i>         | <i>Pinus</i>  | Languedoc-Roussillon (Fr) | shoot                              | KF649558 |
| 2827    | <i>Cinara</i> | <i>brauni</i>         | <i>Pinus</i>  | Almaty ( KZ)              | shoot                              | KF649394 |
| 2988    | <i>Cinara</i> | <i>brevispinosa</i>   | <i>Pinus</i>  | California (US)           | unknown                            | KF649484 |
| 3016    | <i>Cinara</i> | <i>brevispinosa</i>   | <i>Pinus</i>  | Washington (US)           | shoot                              | KF649499 |
| 3040    | <i>Cinara</i> | <i>brevispinosa</i>   | <i>Pinus</i>  | Washington (US)           | shoot                              | KF649513 |
| 3060    | <i>Cinara</i> | <i>brevispinosa</i>   | <i>Pinus</i>  | Oregon (US)               | shoot                              | KF649525 |
| 1971    | <i>Cinara</i> | <i>cedri</i>          | <i>Cedrus</i> | Sicily (It)               | shoot                              | KF649349 |
| 1973    | <i>Cinara</i> | <i>cedri</i>          | <i>Cedrus</i> | Sicily (It)               | shoot                              | KF649350 |
| 1974    | <i>Cinara</i> | <i>cedri</i>          | <i>Cedrus</i> | Sicily (It)               | shoot                              | KF649351 |
| 2802    | <i>Cinara</i> | <i>cedri</i>          | <i>Cedrus</i> | Languedoc-Roussillon (Fr) | branch                             | KF649387 |
| 2834    | <i>Cinara</i> | <i>cedri</i>          | <i>Cedrus</i> | Languedoc-Roussillon (Fr) | branch                             | KF649397 |
| 3033    | <i>Cinara</i> | <i>cedri</i>          | <i>Cedrus</i> | Washington (US)           | branch                             | KF649509 |
| 2706    | <i>Cinara</i> | <i>cembrae</i>        | <i>Pinus</i>  | PACA ( Fr)                | branch                             | KF649368 |
| 2760    | <i>Cinara</i> | <i>cembrae</i>        | <i>Pinus</i>  | PACA ( Fr)                | branch                             | KF649381 |
| 2879    | <i>Cinara</i> | <i>close_C_piceae</i> | <i>Picea</i>  | Colorado (US)             | branch                             | KF649413 |

|       |               |                               |              |                           |         |          |
|-------|---------------|-------------------------------|--------------|---------------------------|---------|----------|
| 2880  | <i>Cinara</i> | <i>close_C_piceae</i>         | <i>Picea</i> | Colorado (US)             | branch  | KF649414 |
| 2914  | <i>Cinara</i> | <i>close_C_piceae</i>         | <i>Picea</i> | New-Mexico (US)           | branch  | KF649445 |
| 2972  | <i>Cinara</i> | <i>close_C_piceae</i>         | <i>Picea</i> | California (US)           | branch  | KF649476 |
| 2903a | <i>Cinara</i> | <i>close_C_piceae</i>         | <i>Picea</i> | Colorado (US)             | branch  | KF649434 |
| 3048  | <i>Cinara</i> | <i>close_coloradensis</i>     | <i>Picea</i> | Oregon (US)               | branch  | KF649517 |
| 2466  | <i>Cinara</i> | <i>confinis</i>               | <i>Abies</i> | Burgundy (Fr)             | branch  | KF649359 |
| 2800  | <i>Cinara</i> | <i>confinis</i>               | <i>Abies</i> | Languedoc-Roussillon (Fr) | trunk   | KF649385 |
| 2801  | <i>Cinara</i> | <i>confinis</i>               | <i>Abies</i> | Languedoc-Roussillon (Fr) | branch  | KF649386 |
| 3010  | <i>Cinara</i> | <i>contortae</i>              | <i>Pinus</i> | Oregon (US)               | branch  | KF649497 |
| 3034  | <i>Cinara</i> | <i>contortae</i>              | <i>Pinus</i> | Washington (US)           | shoot   | KF649510 |
| 3050  | <i>Cinara</i> | <i>contortae</i>              | <i>Pinus</i> | Oregon (US)               | branch  | KF649519 |
| 2612  | <i>Cinara</i> | <i>cuneomaculata</i>          | <i>Larix</i> | Rhone-Alpes (Fr)          | branch  | KF649360 |
| 2692  | <i>Cinara</i> | <i>cuneomaculata</i>          | <i>Larix</i> | PACA ( Fr)                | branch  | KF649365 |
| 2693  | <i>Cinara</i> | <i>cuneomaculata</i>          | <i>Larix</i> | PACA ( Fr)                | branch  | KF649366 |
| 2700  | <i>Cinara</i> | <i>cuneomaculata</i>          | <i>Larix</i> | PACA ( Fr)                | branch  | KF649367 |
| 445a  | <i>Cinara</i> | <i>cuneomaculata</i>          | <i>Larix</i> | Languedoc-Roussillon (Fr) | unknown | KF649555 |
| 3053  | <i>Cinara</i> | <i>curtihirsuta</i>           | <i>Abies</i> | Oregon (US)               | trunk   | KF649522 |
| 3070  | <i>Cinara</i> | <i>curtihirsuta</i>           | <i>Abies</i> | Oregon (US)               | branch  | KF649533 |
| 3072  | <i>Cinara</i> | <i>curtihirsuta</i>           | <i>Abies</i> | California (US)           | branch  | KF649535 |
| 3075  | <i>Cinara</i> | <i>curtihirsuta</i>           | <i>Abies</i> | California (US)           | branch  | KF649538 |
| 3078  | <i>Cinara</i> | <i>curtihirsuta</i>           | <i>Abies</i> | California (US)           | branch  | KF649541 |
| 2891  | <i>Cinara</i> | <i>edulis</i>                 | <i>Pinus</i> | Colorado (US)             | branch  | KF649424 |
| 2894  | <i>Cinara</i> | <i>edulis</i>                 | <i>Pinus</i> | Colorado (US)             | branch  | KF649427 |
| 2904  | <i>Cinara</i> | <i>englemanniensis_bonica</i> | <i>Picea</i> | Colorado (US)             | branch  | KF649436 |
| 2907  | <i>Cinara</i> | <i>fornacula</i>              | <i>Picea</i> | Colorado (US)             | shoot   | KF649439 |

|        |               |                     |                  |                           |         |          |
|--------|---------------|---------------------|------------------|---------------------------|---------|----------|
| 2912   | <i>Cinara</i> | <i>fornacula</i>    | <i>Picea</i>     | Colorado (US)             | shoot   | KF649443 |
| 2983   | <i>Cinara</i> | <i>fresai</i>       | <i>Cupressus</i> | California (US)           | shoot   | KF649480 |
| 2993   | <i>Cinara</i> | <i>fresai</i>       | <i>Cupressus</i> | California (US)           | shoot   | KF649486 |
| 3003   | <i>Cinara</i> | <i>fresai</i>       | <i>Cupressus</i> | Oregon (US)               | shoot   | KF649492 |
| 3038   | <i>Cinara</i> | <i>fresai</i>       | <i>Cupressus</i> | Washington (US)           | shoot   | KF649511 |
| 1785   | <i>Cinara</i> | <i>fresai</i>       | <i>Juniperus</i> | Haute-Normandie (Fr)      | shoot   | KF649347 |
| 2924a  | <i>Cinara</i> | <i>glabra</i>       | <i>Pinus</i>     | New-Mexico (US)           | shoot   | KF649455 |
| 2969b  | <i>Cinara</i> | <i>glabra</i>       | <i>Pinus</i>     | California (US)           | branch  | KF649474 |
| 2870b  | <i>Cinara</i> | <i>glabra</i>       | <i>Pinus</i>     | Colorado (US)             | shoot   | KF649406 |
| 2906   | <i>Cinara</i> | <i>grande</i>       | <i>Abies</i>     | Colorado (US)             | branch  | KF649438 |
| 2925   | <i>Cinara</i> | <i>gudaris</i>      | <i>Pinus</i>     | Languedoc-Roussillon (Fr) | shoot   | KF649458 |
| 2903b  | <i>Cinara</i> | <i>hottesi</i>      | <i>Picea</i>     | Colorado (US)             | branch  | KF649435 |
| 2709   | <i>Cinara</i> | <i>juniperi</i>     | <i>Juniperus</i> | PACA ( Fr)                | shoot   | KF649370 |
| 2720   | <i>Cinara</i> | <i>juniperi</i>     | <i>Juniperus</i> | PACA ( Fr)                | shoot   | KF649372 |
| 2763   | <i>Cinara</i> | <i>juniperi</i>     | <i>Juniperus</i> | PACA ( Fr)                | shoot   | KF649383 |
| 2952   | <i>Cinara</i> | <i>juniperi</i>     | <i>Juniperus</i> | PACA ( Fr)                | unknown | KF649465 |
| 640bis | <i>Cinara</i> | <i>juniperi</i>     | <i>Juniperus</i> | Aquitaine ( Fr)           | unknown | KF649559 |
| 2762   | <i>Cinara</i> | <i>kochiana</i>     | <i>Larix</i>     | PACA ( Fr)                | trunk   | KF649382 |
| 2940   | <i>Cinara</i> | <i>kochiana</i>     | <i>Larix</i>     | PACA ( Fr)                | trunk   | KF649462 |
| 3058   | <i>Cinara</i> | <i>laricifoliae</i> | <i>Larix</i>     | Oregon (US)               | branch  | KF649524 |
| 3068   | <i>Cinara</i> | <i>laricifoliae</i> | <i>Larix</i>     | Oregon (US)               | branch  | KF649532 |
| 2708   | <i>Cinara</i> | <i>laricis</i>      | <i>Larix</i>     | PACA ( Fr)                | branch  | KF649369 |
| 2945   | <i>Cinara</i> | <i>laricis</i>      | <i>Larix</i>     | PACA ( Fr)                | branch  | KF649464 |
| 3094   | <i>Cinara</i> | <i>laricis</i>      | <i>Larix</i>     | Valais ( CH)              | branch  | KF649554 |
| 445b   | <i>Cinara</i> | <i>laricis</i>      | <i>Larix</i>     | Languedoc-Roussillon (Fr) | unknown | KF649556 |

|       |               |                               |              |                 |         |          |
|-------|---------------|-------------------------------|--------------|-----------------|---------|----------|
| 2382  | <i>Cinara</i> | <i>maghrebica</i>             | <i>Pinus</i> | Khenchela (Al)  | unknown | KF649357 |
| 2873  | <i>Cinara</i> | <i>medispinosa</i>            | <i>Pinus</i> | Colorado (US)   | shoot   | KF649409 |
| 2874  | <i>Cinara</i> | <i>medispinosa</i>            | <i>Pinus</i> | Colorado (US)   | shoot   | KF649410 |
| 2875  | <i>Cinara</i> | <i>medispinosa</i>            | <i>Pinus</i> | Colorado (US)   | branch  | KF649411 |
| 3080  | <i>Cinara</i> | <i>moketa</i>                 | <i>Pinus</i> | California (US) | branch  | KF649543 |
| 3084  | <i>Cinara</i> | <i>moketa</i>                 | <i>Pinus</i> | California (US) | branch  | KF649547 |
| 3085  | <i>Cinara</i> | <i>moketa</i>                 | <i>Pinus</i> | California (US) | branch  | KF649548 |
| 3086  | <i>Cinara</i> | <i>moketa</i>                 | <i>Pinus</i> | California (US) | branch  | KF649549 |
| 3087  | <i>Cinara</i> | <i>moketa</i>                 | <i>Pinus</i> | California (US) | branch  | KF649550 |
| 3051  | <i>Cinara</i> | <i>murrayanae</i>             | <i>Pinus</i> | Oregon (US)     | branch  | KF649520 |
| 3063  | <i>Cinara</i> | <i>murrayanae</i>             | <i>Pinus</i> | Oregon (US)     | branch  | KF649528 |
| 3066  | <i>Cinara</i> | <i>murrayanae</i>             | <i>Pinus</i> | Oregon (US)     | branch  | KF649530 |
| 3067  | <i>Cinara</i> | <i>murrayanae</i>             | <i>Pinus</i> | Oregon (US)     | shoot   | KF649531 |
| 3071  | <i>Cinara</i> | <i>murrayanae</i>             | <i>Pinus</i> | Oregon (US)     | branch  | KF649534 |
| 3065  | <i>Cinara</i> | <i>murrayanae_medispinosa</i> | <i>Pinus</i> | Oregon (US)     | gall    | KF649529 |
| 2829  | <i>Cinara</i> | <i>near_guadarramae</i>       | <i>Pinus</i> | Almaty ( KZ)    | branch  | KF649395 |
| 2747  | <i>Cinara</i> | <i>neubergi</i>               | <i>Pinus</i> | PACA ( Fr)      | shoot   | KF649380 |
| 2837  | <i>Cinara</i> | <i>nuda</i>                   | <i>Pinus</i> | Aquitaine ( Fr) | branch  | KF649399 |
| 2902  | <i>Cinara</i> | <i>obscura_sitchensis</i>     | <i>Picea</i> | Colorado (US)   | branch  | KF649433 |
| 2910  | <i>Cinara</i> | <i>obscura_sitchensis</i>     | <i>Picea</i> | Colorado (US)   | shoot   | KF649441 |
| 2911  | <i>Cinara</i> | <i>obscura_sitchensis</i>     | <i>Picea</i> | Colorado (US)   | branch  | KF649442 |
| 2913b | <i>Cinara</i> | <i>obscura_sitchensis</i>     | <i>Picea</i> | Colorado (US)   | branch  | KF649444 |
| 2884  | <i>Cinara</i> | <i>occidentalis</i>           | <i>Abies</i> | Colorado (US)   | shoot   | KF649418 |
| 3024  | <i>Cinara</i> | <i>occidentalis</i>           | <i>Abies</i> | Washington (US) | shoot   | KF649503 |
| 3049  | <i>Cinara</i> | <i>occidentalis</i>           | <i>Abies</i> | Oregon (US)     | branch  | KF649518 |

|      |               |                       |                    |                           |         |          |
|------|---------------|-----------------------|--------------------|---------------------------|---------|----------|
| 3074 | <i>Cinara</i> | <i>occidentalis</i>   | <i>Abies</i>       | California (US)           | branch  | KF649537 |
| 3079 | <i>Cinara</i> | <i>occidentalis</i>   | <i>Abies</i>       | California (US)           | branch  | KF649542 |
| 3081 | <i>Cinara</i> | <i>occidentalis</i>   | <i>Abies</i>       | California (US)           | branch  | KF649544 |
| 3090 | <i>Cinara</i> | <i>occidentalis</i>   | <i>Abies</i>       | California (US)           | branch  | KF649551 |
| 2916 | <i>Cinara</i> | <i>occidentalis</i>   | <i>Pseudotsuga</i> | New-Mexico (US)           | branch  | KF649447 |
| 1046 | <i>Cinara</i> | <i>palaestinensis</i> | <i>Pinus</i>       | Languedoc-Roussillon (Fr) | unknown | KF649338 |
| 1542 | <i>Cinara</i> | <i>palaestinensis</i> | <i>Pinus</i>       | Peloponèse ( Gr)          | shoot   | KF649346 |
| 446  | <i>Cinara</i> | <i>pectinatae</i>     | <i>Abies</i>       | Languedoc-Roussillon (Fr) | unknown | KF649557 |
| 2725 | <i>Cinara</i> | <i>pectinatae</i>     | <i>Abies</i>       | Languedoc-Roussillon (Fr) | shoot   | KF649375 |
| 2727 | <i>Cinara</i> | <i>pectinatae</i>     | <i>Abies</i>       | Languedoc-Roussillon (Fr) | unknown | KF649377 |
| 2905 | <i>Cinara</i> | <i>petersoni</i>      | <i>Juniperus</i>   | Colorado (US)             | shoot   | KF649437 |
| 2188 | <i>Cinara</i> | <i>pilicornis</i>     | <i>Picea</i>       | Almaty ( KZ)              | shoot   | KF649354 |
| 2674 | <i>Cinara</i> | <i>pilicornis</i>     | <i>Picea</i>       | Languedoc-Roussillon (Fr) | shoot   | KF649362 |
| 2769 | <i>Cinara</i> | <i>pilicornis</i>     | <i>Picea</i>       | PACA ( Fr)                | branch  | KF649384 |
| 2805 | <i>Cinara</i> | <i>pilicornis</i>     | <i>Picea</i>       | Almaty ( KZ)              | shoot   | KF649389 |
| 2811 | <i>Cinara</i> | <i>pilicornis</i>     | <i>Picea</i>       | Almaty ( KZ)              | branch  | KF649392 |
| 2826 | <i>Cinara</i> | <i>pilicornis</i>     | <i>Picea</i>       | Almaty ( KZ)              | shoot   | KF649393 |
| 2984 | <i>Cinara</i> | <i>pilicornis</i>     | <i>Picea</i>       | California (US)           | shoot   | KF649481 |
| 2992 | <i>Cinara</i> | <i>pilicornis</i>     | <i>Picea</i>       | California (US)           | shoot   | KF649485 |
| 3006 | <i>Cinara</i> | <i>pilicornis</i>     | <i>Picea</i>       | Oregon (US)               | shoot   | KF649495 |
| 3023 | <i>Cinara</i> | <i>pilicornis</i>     | <i>Picea</i>       | Washington (US)           | unknown | KF649502 |
| 3031 | <i>Cinara</i> | <i>pilicornis</i>     | <i>Picea</i>       | Washington (US)           | shoot   | KF649507 |
| 1114 | <i>Cinara</i> | <i>pinea</i>          | <i>Pinus</i>       | Languedoc-Roussillon (Fr) | shoot   | KF649340 |
| 1262 | <i>Cinara</i> | <i>pinea</i>          | <i>Pinus</i>       | Limousin ( Fr)            | unknown | KF649345 |
| 2163 | <i>Cinara</i> | <i>pinea</i>          | <i>Pinus</i>       | Almaty ( KZ)              | shoot   | KF649353 |

|       |               |                      |              |                           |         |          |
|-------|---------------|----------------------|--------------|---------------------------|---------|----------|
| 2265  | <i>Cinara</i> | <i>pinea</i>         | <i>Pinus</i> | Almaty ( KZ)              | shoot   | KF649355 |
| 2669  | <i>Cinara</i> | <i>pinea</i>         | <i>Pinus</i> | PACA ( Fr)                | shoot   | KF649361 |
| 2686  | <i>Cinara</i> | <i>pinea</i>         | <i>Pinus</i> | PACA ( Fr)                | shoot   | KF649364 |
| 2723  | <i>Cinara</i> | <i>pinea</i>         | <i>Pinus</i> | Languedoc-Roussillon (Fr) | shoot   | KF649373 |
| 2724  | <i>Cinara</i> | <i>pinea</i>         | <i>Pinus</i> | Languedoc-Roussillon (Fr) | shoot   | KF649374 |
| 2728  | <i>Cinara</i> | <i>pinea</i>         | <i>Pinus</i> | Languedoc-Roussillon (Fr) | unknown | KF649378 |
| 2810  | <i>Cinara</i> | <i>pinea</i>         | <i>Pinus</i> | Almaty ( KZ)              | shoot   | KF649391 |
| 2830  | <i>Cinara</i> | <i>pinea</i>         | <i>Pinus</i> | Almaty ( KZ)              | shoot   | KF649396 |
| 2941  | <i>Cinara</i> | <i>pinea</i>         | <i>Pinus</i> | PACA ( Fr)                | branch  | KF649463 |
| 3005  | <i>Cinara</i> | <i>pinea</i>         | <i>Pinus</i> | Oregon (US)               | shoot   | KF649494 |
| 3032  | <i>Cinara</i> | <i>pinea</i>         | <i>Pinus</i> | Washington (US)           | shoot   | KF649508 |
| 3039  | <i>Cinara</i> | <i>pinea</i>         | <i>Pinus</i> | Washington (US)           | shoot   | KF649512 |
| 3052  | <i>Cinara</i> | <i>pinea</i>         | <i>Pinus</i> | Oregon (US)               | shoot   | KF649521 |
| 1239a | <i>Cinara</i> | <i>pinea</i>         | <i>Pinus</i> | Auvergne ( Fr)            | unknown | KF649342 |
| 1261b | <i>Cinara</i> | <i>pinea</i>         | <i>Pinus</i> | Limousin ( Fr)            | unknown | KF649344 |
| 2682  | <i>Cinara</i> | <i>pini</i>          | <i>Pinus</i> | PACA ( Fr)                | branch  | KF649363 |
| 2710  | <i>Cinara</i> | <i>pini</i>          | <i>Pinus</i> | PACA ( Fr)                | shoot   | KF649371 |
| 2729  | <i>Cinara</i> | <i>pini</i>          | <i>Pinus</i> | PACA ( Fr)                | branch  | KF649379 |
| 2932  | <i>Cinara</i> | <i>pini</i>          | <i>Pinus</i> | PACA ( Fr)                | branch  | KF649459 |
| 2934  | <i>Cinara</i> | <i>pini</i>          | <i>Pinus</i> | PACA ( Fr)                | branch  | KF649460 |
| 2935  | <i>Cinara</i> | <i>pini</i>          | <i>Pinus</i> | PACA ( Fr)                | branch  | KF649461 |
| 1261a | <i>Cinara</i> | <i>pini</i>          | <i>Pinus</i> | Limousin ( Fr)            | unknown | KF649343 |
| 2017  | <i>Cinara</i> | <i>pinimaritimae</i> | <i>Pinus</i> | Sicily (It)               | shoot   | KF649352 |
| 3018  | <i>Cinara</i> | <i>pinivora</i>      | <i>Pinus</i> | Washington (US)           | branch  | KF649501 |
| 2863  | <i>Cinara</i> | <i>ponderosae</i>    | <i>Pinus</i> | Colorado (US)             | shoot   | KF649402 |

|       |               |                         |                    |                           |        |          |
|-------|---------------|-------------------------|--------------------|---------------------------|--------|----------|
| 2867  | <i>Cinara</i> | <i>ponderosae</i>       | <i>Pinus</i>       | Colorado (US)             | shoot  | KF649404 |
| 2871  | <i>Cinara</i> | <i>ponderosae</i>       | <i>Pinus</i>       | Colorado (US)             | branch | KF649407 |
| 2872  | <i>Cinara</i> | <i>ponderosae</i>       | <i>Pinus</i>       | Colorado (US)             | shoot  | KF649408 |
| 2887  | <i>Cinara</i> | <i>ponderosae</i>       | <i>Pinus</i>       | Colorado (US)             | shoot  | KF649420 |
| 2958  | <i>Cinara</i> | <i>ponderosae</i>       | <i>Pinus</i>       | California (US)           | shoot  | KF649468 |
| 2997  | <i>Cinara</i> | <i>ponderosae</i>       | <i>Pinus</i>       | California (US)           | shoot  | KF649489 |
| 3061  | <i>Cinara</i> | <i>ponderosae</i>       | <i>Pinus</i>       | Oregon (US)               | shoot  | KF649526 |
| 3062  | <i>Cinara</i> | <i>ponderosae</i>       | <i>Pinus</i>       | Oregon (US)               | shoot  | KF649527 |
| 3073  | <i>Cinara</i> | <i>ponderosae</i>       | <i>Pinus</i>       | California (US)           | branch | KF649536 |
| 3083  | <i>Cinara</i> | <i>ponderosae</i>       | <i>Pinus</i>       | California (US)           | shoot  | KF649546 |
| 3091  | <i>Cinara</i> | <i>ponderosae</i>       | <i>Pinus</i>       | California (US)           | shoot  | KF649552 |
| 2924b | <i>Cinara</i> | <i>ponderosae</i>       | <i>Pinus</i>       | NewMexico                 | shoot  | KF649456 |
| 661   | <i>Cinara</i> | <i>pruinosa</i>         | <i>Picea</i>       | Mid-Pyrenees ( Fr)        | shoot  | KF649560 |
| 2726  | <i>Cinara</i> | <i>pruinosa</i>         | <i>Picea</i>       | Languedoc-Roussillon (Fr) | branch | KF649376 |
| 2804  | <i>Cinara</i> | <i>pruinosa</i>         | <i>Picea</i>       | Almaty ( KZ)              | branch | KF649388 |
| 2806  | <i>Cinara</i> | <i>pruinosa</i>         | <i>Picea</i>       | Almaty ( KZ)              | branch | KF649390 |
| 2909  | <i>Cinara</i> | <i>pruinosa</i>         | <i>Picea</i>       | Colorado (US)             | branch | KF649440 |
| 2883  | <i>Cinara</i> | <i>pruinosa</i>         | <i>Picea</i>       | Colorado (US)             | branch | KF649417 |
| 2882  | <i>Cinara</i> | <i>pseudotaxifoliae</i> | <i>Pseudotsuga</i> | Colorado (US)             | branch | KF649416 |
| 2888  | <i>Cinara</i> | <i>pseudotaxifoliae</i> | <i>Pseudotsuga</i> | Colorado (US)             | branch | KF649421 |
| 2917  | <i>Cinara</i> | <i>pseudotaxifoliae</i> | <i>Pseudotsuga</i> | New-Mexico (US)           | shoot  | KF649448 |
| 2919  | <i>Cinara</i> | <i>pseudotaxifoliae</i> | <i>Pseudotsuga</i> | New-Mexico (US)           | shoot  | KF649450 |
| 2981  | <i>Cinara</i> | <i>pseudotaxifoliae</i> | <i>Pseudotsuga</i> | California (US)           | branch | KF649478 |
| 2999  | <i>Cinara</i> | <i>pseudotaxifoliae</i> | <i>Pseudotsuga</i> | Oregon (US)               | branch | KF649490 |
| 3001  | <i>Cinara</i> | <i>pseudotaxifoliae</i> | <i>Pseudotsuga</i> | Oregon (US)               | branch | KF649491 |



|         |               |                                  |                    |                 |        |          |
|---------|---------------|----------------------------------|--------------------|-----------------|--------|----------|
| 3029    | <i>Cinara</i> | <i>pseudotaxifoliae</i>          | <i>Pseudotsuga</i> | Washington (US) | branch | KF649506 |
| 3047    | <i>Cinara</i> | <i>pseudotaxifoliae</i>          | <i>Pseudotsuga</i> | Oregon (US)     | N      | KF649516 |
| 3056    | <i>Cinara</i> | <i>pseudotaxifoliae</i>          | <i>Pseudotsuga</i> | Oregon (US)     | branch | KF649523 |
| 3076    | <i>Cinara</i> | <i>pseudotaxifoliae</i>          | <i>Pseudotsuga</i> | California (US) | branch | KF649539 |
| 2921    | <i>Cinara</i> | <i>pseudotaxifoliae</i>          | <i>Abies</i>       | New-Mexico (US) | branch | KF649452 |
| 2881    | <i>Cinara</i> | <i>pseudotsugae_sensu_Palmer</i> | <i>Pseudotsuga</i> | Colorado (US)   | shoot  | KF649415 |
| 2889    | <i>Cinara</i> | <i>pseudotsugae_sensu_Palmer</i> | <i>Pseudotsuga</i> | Colorado (US)   | branch | KF649422 |
| 2918    | <i>Cinara</i> | <i>pseudotsugae_sensu_Palmer</i> | <i>Pseudotsuga</i> | New-Mexico (US) | branch | KF649449 |
| 2915bis | <i>Cinara</i> | <i>pseudotsugae_sensu_Palmer</i> | <i>Pseudotsuga</i> | New-Mexico (US) | N      | KF649446 |
| 2890    | <i>Cinara</i> | <i>pseudotsugae_sensu_Palmer</i> | <i>Pseudotsuga</i> | Colorado (US)   | branch | KF649423 |
| 2895    | <i>Cinara</i> | <i>puerca</i>                    | <i>Pinus</i>       | Colorado (US)   | trunk  | KF649428 |
| 2968    | <i>Cinara</i> | <i>puerca</i>                    | <i>Pinus</i>       | California (US) | branch | KF649473 |
| 2877    | <i>Cinara</i> | <i>schwartzii</i>                | <i>Pinus</i>       | Colorado (US)   | branch | KF649412 |
| 2898    | <i>Cinara</i> | <i>schwartzii</i>                | <i>Pinus</i>       | Colorado (US)   | branch | KF649430 |
| 2971    | <i>Cinara</i> | <i>schwartzii</i>                | <i>Pinus</i>       | California (US) | branch | KF649475 |
| 2901b   | <i>Cinara</i> | <i>schwartzii</i>                | <i>Pinus</i>       | Colorado (US)   | branch | KF649432 |
| 2924c   | <i>Cinara</i> | <i>schwartzii</i>                | <i>Pinus</i>       | New-Mexico (US) | shoot  | KF649457 |
| 3028    | <i>Cinara</i> | <i>sitchensis</i>                | <i>Picea</i>       | Washington (US) | branch | KF649505 |
| 2862b   | <i>Cinara</i> | <i>solitaria</i>                 | <i>Pinus</i>       | Colorado (US)   | shoot  | KF649401 |
| 2870a   | <i>Cinara</i> | <i>solitaria</i>                 | <i>Pinus</i>       | Colorado (US)   | shoot  | KF649405 |
| 2987    | <i>Cinara</i> | <i>splendens_sensu_Palmer</i>    | <i>Pseudotsuga</i> | California (US) | shoot  | KF649483 |
| 2996    | <i>Cinara</i> | <i>splendens_sensu_Palmer</i>    | <i>Pseudotsuga</i> | California (US) | shoot  | KF649488 |
| 3004    | <i>Cinara</i> | <i>splendens_sensu_Palmer</i>    | <i>Pseudotsuga</i> | Oregon (US)     | shoot  | KF649493 |
| 3025    | <i>Cinara</i> | <i>splendens_sensu_Palmer</i>    | <i>Pseudotsuga</i> | Washington (US) | branch | KF649504 |
| 3077    | <i>Cinara</i> | <i>splendens_sensu_Palmer</i>    | <i>Pseudotsuga</i> | California (US) | branch | KF649540 |

|         |                |                               |                      |                           |                |          |
|---------|----------------|-------------------------------|----------------------|---------------------------|----------------|----------|
| 3093    | <i>Cinara</i>  | <i>splendens_sensu_Palmer</i> | <i>Pseudotsuga</i>   | California (US)           | twig           | KF649553 |
| 2955    | <i>Cinara</i>  | <i>terminalis</i>             | <i>Pinus</i>         | California (US)           | shoot          | KF649466 |
| 2964    | <i>Cinara</i>  | <i>terminalis</i>             | <i>Pinus</i>         | California (US)           | shoot          | KF649470 |
| 2966    | <i>Cinara</i>  | <i>terminalis</i>             | <i>Pinus</i>         | California (US)           | shoot          | KF649471 |
| 2858    | <i>Cinara</i>  | <i>terminalis</i>             | <i>Pinus</i>         | Colorado (US)             | shoot          | KF649400 |
| 2892    | <i>Cinara</i>  | <i>terminalis</i>             | <i>Pinus</i>         | Colorado (US)             | shoot          | KF649425 |
| 2922    | <i>Cinara</i>  | <i>terminalis</i>             | <i>Pinus</i>         | New-Mexico (US)           | shoot          | KF649453 |
| 2899bis | <i>Cinara</i>  | <i>terminalis</i>             | <i>Pinus</i>         | Colorado (US)             | shoot          | KF649431 |
| 1969    | <i>Cinara</i>  | <i>tujafilina</i>             | <i>Chamaecyparis</i> | Sicily (It)               | shoot          | KF649348 |
| 2462    | <i>Cinara</i>  | <i>tujafilina</i>             | <i>Thuja</i>         | Languedoc-Roussillon (Fr) | shoot          | KF649358 |
| 2835    | <i>Cinara</i>  | <i>tujafilina</i>             | <i>Thuja</i>         | Languedoc-Roussillon (Fr) | shoot          | KF649398 |
| 3009    | <i>Cinara</i>  | unknown                       | <i>Picea</i>         | Oregon (US)               | branch         | KF649496 |
| 3011    | <i>Cinara</i>  | unknown                       | <i>Picea</i>         | Washington (US)           | shoot          | KF649498 |
| 3017    | <i>Cinara</i>  | unknown                       | <i>Picea</i>         | Washington (US)           | branch         | KF649500 |
| 3046    | <i>Cinara</i>  | unknown                       | <i>Picea</i>         | Oregon (US)               | branch         | KF649515 |
| 3082    | <i>Cinara</i>  | unknown                       | <i>Picea</i>         | California (US)           | shoot          | KF649545 |
| 2985    | <i>Cinara</i>  | unknown                       | <i>Picea</i>         | California (US)           | shoot          | KF649482 |
| 2885b   | <i>Cinara</i>  | <i>vandykei</i>               | <i>Picea</i>         | Colorado (US)             | branch         | KF649419 |
| 2896    | <i>Cinara</i>  | <i>wahluca</i>                | <i>Juniperus</i>     | Colorado (US)             | branch         | KF649429 |
| 2893    | <i>Cinara</i>  | <i>wahtolca</i>               | <i>Pinus</i>         | Colorado (US)             | branch         | KF649426 |
| 2923    | <i>Cinara</i>  | <i>wahtolca</i>               | <i>Pinus</i>         | New-Mexico (US)           | branch         | KF649454 |
| 2975    | <i>Cinara</i>  | <i>watsoni</i>                | <i>Pinus</i>         | California (US)           | shoot          | KF649477 |
| 2982    | <i>Cinara</i>  | <i>watsoni</i>                | <i>Pinus</i>         | California (US)           | shoot          | KF649479 |
| 1101    | <i>Lachnus</i> | <i>roboris</i>                | <i>Quercus</i>       | Languedoc-Roussillon(FR)  | Not applicable | KF649339 |
| 1211    | <i>Trama</i>   | <i>troglydytes</i>            | <i>Achillea</i>      | Haute-Normandie (FR)      | Not applicable | KF649341 |

|      |                      |                 |              |                          |                |          |
|------|----------------------|-----------------|--------------|--------------------------|----------------|----------|
| 2318 | <i>Tuberolachnus</i> | <i>salignus</i> | <i>Salix</i> | Languedoc-Roussillon(FR) | Not applicable | KF649356 |
|------|----------------------|-----------------|--------------|--------------------------|----------------|----------|

**Figure S1.** Distributions of the conifer-feeding aphids at the collection sites in the mountains of southwest China. This original map was created using ArcGIS 9.3 software.

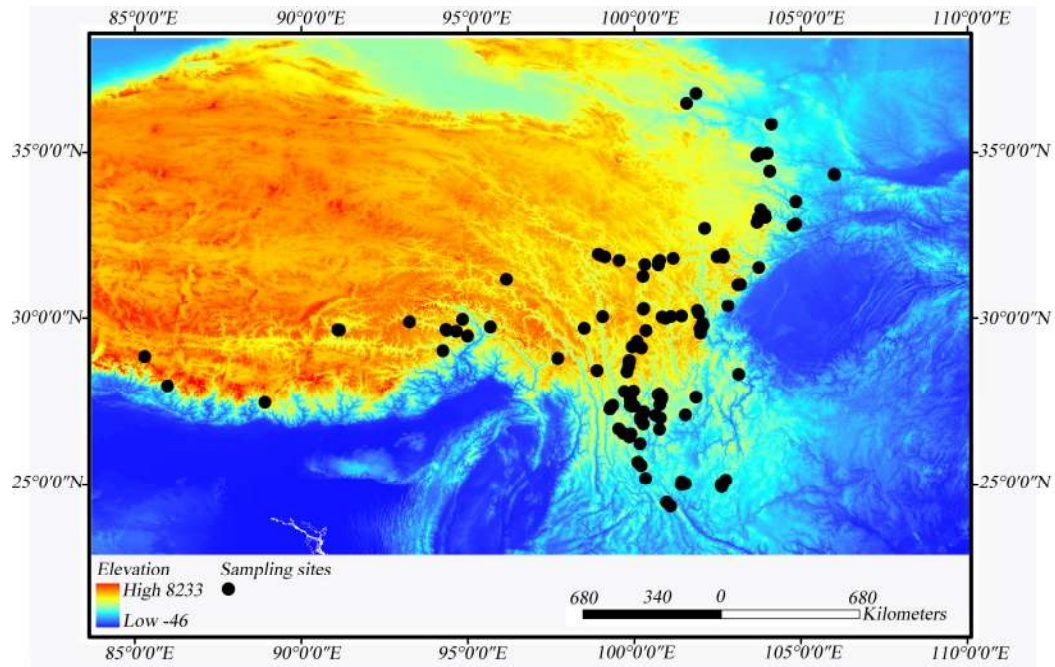

Supplement: srep20123-s1.pdf [file srep20123-s1.pdf]
